# Supplementary material for: Iron-catalyzed oxidative synthesis of N-heterocycles from primary alcohols
Source: Royal Society of Chemistry journal article supplement (doi:10.1039/c3ra46363j), 2014-01-01

## Iron-catalyzed oxidative synthesis of N-heterocycles from primary alcohols

Dan Zhao, Yu-Ren Zhou, Qi Shen, and Jian-Xin Li\*

*State Key lab of Analytical Chemistry for Life Science, School of Chemistry and  
Chemical Engineering, Nanjing University, Nanjing, 210093, P. R. China.*

*Fax: +86-25-83686419; E-mail: [lijxnju@nju.edu.cn](mailto:lijxnju@nju.edu.cn)*

### Electronic Supplementary Information Content

|                                                                         |                |
|-------------------------------------------------------------------------|----------------|
| <b>General information</b>                                              | <b>S2</b>      |
| <b>Experimental section</b>                                             | <b>S2</b>      |
| <b>Product characterizations</b>                                        | <b>S3–S10</b>  |
| <b>References</b>                                                       | <b>S10</b>     |
| <b><sup>1</sup>H- and <sup>13</sup>C-NMR spectral data for products</b> | <b>S11–S42</b> |

## General information

All manipulations were carried out under air atmosphere unless otherwise specified. Melting points were measured with an X-4 melting point apparatus (Bei Jing Taike Co., Ltd.) and were uncorrected.  $^1\text{H}$ -NMR and  $^{13}\text{C}$ -NMR were determined in  $\text{CDCl}_3$  or  $\text{DMSO}-d_6$  on a Bruker DPX 300 MHz or a Bruker AVANCE III 400 MHz spectrometer at room temperature, respectively, and tetramethylsilane (TMS) served as an internal standard. Spin multiplicities are given as s (singlet), d (doublet), t (triplet), q (quartet) and m (multiplet) as well as brs (broad). Coupling constants ( $J$ ) are given in hertz (Hz). ESI-MS was carried out on a LCMS-2020 (Shimadzu, Japan). HRMS were recorded on a LTQ-Orbitrap XL (ThermoFisher, U.S.A.). All experiments were monitored by thin layer chromatography (TLC). TLC was performed on pre-coated silica gel plates (Qingdao Haiyang Chemical Co., Ltd).

## Experimental section

### General procedure for the synthesis of quinazolin-4(3H)-ones 3a–k:

A mixture of benzyl alcohol **1** (1.5 mmol), *o*-aminobenzamide **2** (0.5 mmol), 0.01 mmol  $\text{FeCl}_3$  (0.1 M in DMSO, 100  $\mu\text{L}$ ) and 1.5 mmol TBHP (5.5 M in decane, 270  $\mu\text{L}$ ) in 2 mL DMSO was stirred in a Schlenk tube at 60  $^\circ\text{C}$ . After stirring for 7 h, the reaction mixture was cooled to the room temperature, and diluted with ethyl acetate, washed with brine, dried over anhydrous  $\text{Na}_2\text{SO}_4$  and concentrated in vacuo. The residue was then purified by chromatography on silica gel with a eluent of petroleum ether and ethyl acetate. Products were characterized by Mp,  $^1\text{H}$ -,  $^{13}\text{C}$ -NMR and MS (ESI).

### General procedure for the synthesis of quinazolines 5a–j:

A mixture of benzyl alcohol **1** (1.5 mmol), 0.01 mmol  $\text{FeCl}_3$  (0.1 M in DMSO, 100  $\mu\text{L}$ ) and 1.5 mmol TBHP (5.5 M in decane, 270  $\mu\text{L}$ ) in 1 mL DMSO was stirred in a Schlenk tube at 60  $^\circ\text{C}$  under  $\text{N}_2$ . *O*-aminobenzylamine **4** (0.5 mmol) in 1 mL DMSO was slowly added by syringe pump over 3h at 60  $^\circ\text{C}$ . After stirring for 6 h, the reaction mixture was cooled to the room temperature, and diluted with ethyl acetate, washed with brine, dried over anhydrous  $\text{Na}_2\text{SO}_4$  and concentrated in vacuo. The residue was then purified by chromatography on silica gel with a eluent of petroleum ether and ethyl acetate. Products were characterized by Mp,  $^1\text{H}$ -,  $^{13}\text{C}$ -NMR and MS (ESI).

### General procedure for the synthesis of 3,4-dihydro-2H-1,2,4-benzothiadiazine 1,1-dioxides 7a–k:

A mixture of benzyl alcohol **1** (1.5 mmol), *o*-aminobenzenesulfonamide **6** (0.5 mmol), 0.01 mmol  $\text{FeCl}_3$  (0.1 M in DMSO, 100  $\mu\text{L}$ ) and 1.5 mmol TBHP (5.5 M in decane, 270  $\mu\text{L}$ ) in 2 mL DMSO was stirred in a Schlenk tube at 60  $^\circ\text{C}$ . After stirring for 12 h, the reaction mixture was cooled to the room temperature, and diluted with ethyl acetate, washed with brine, dried over anhydrous  $\text{Na}_2\text{SO}_4$  and concentrated in vacuo. The residue was then purified by chromatography on silica gel with a eluent of dichloromethane and ethyl acetate. Products were characterized by Mp,  $^1\text{H}$ -,  $^{13}\text{C}$ -NMR and MS (ESI).

## Product characterizations

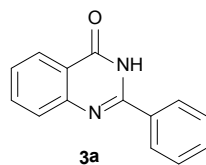

*2-phenylquinazolin-4(3H)-one (3a)*<sup>1</sup>. white solid, 93% yield, mp. 235 – 237 °C. <sup>1</sup>H NMR (300 MHz, DMSO-*d*<sub>6</sub>) δ 12.53 (brs, 1H), 8.16 (t, *J* = 7.7 Hz, 3H), 7.83 (t, *J* = 7.1 Hz, 1H), 7.73 (d, *J* = 8.0 Hz, 1H), 7.65 – 7.41 (m, 4H); <sup>13</sup>C NMR (100 MHz, DMSO-*d*<sub>6</sub>) δ 162.2, 152.3, 148.7, 134.6, 132.7, 131.4, 128.6, 127.7, 127.5, 126.5, 125.8, 121.0; MS (ESI): 223.00 [M+H]<sup>+</sup>.

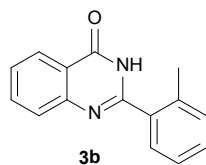

*2-(o-tolyl)quinazolin-4(3H)-one (3b)*<sup>2</sup>. white solid, 57% yield, mp. 216 – 218 °C. <sup>1</sup>H NMR (300 MHz, DMSO-*d*<sub>6</sub>) δ 12.43 (brs, 1H), 8.16 (d, *J* = 7.9 Hz, 1H), 7.87 – 7.76 (m, 1H), 7.67 (d, *J* = 8.0 Hz, 1H), 7.59 – 7.46 (m, 2H), 7.45 – 7.37 (m, 1H), 7.37 – 7.25 (m, 2H), 2.37 (s, 3H); <sup>13</sup>C NMR (100 MHz, DMSO-*d*<sub>6</sub>) δ 161.7, 154.3, 148.7, 136.1, 134.4, 134.2, 130.5, 129.9, 129.1, 127.3, 126.6, 125.8, 125.7, 121.0, 19.5; MS (ESI): 236.95 [M+H]<sup>+</sup>.

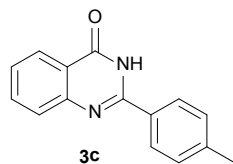

*2-(p-tolyl)quinazolin-4(3H)-one (3c)*<sup>1</sup>. white solid, 66% yield, mp. 241 – 243 °C. <sup>1</sup>H NMR (300 MHz, DMSO-*d*<sub>6</sub>) δ 12.44 (brs, 1H), 8.13 (dd, *J* = 7.9, 1.0 Hz, 1H), 8.08 (d, *J* = 8.2 Hz, 2H), 7.87 – 7.75 (m, 1H), 7.70 (d, *J* = 7.8 Hz, 1H), 7.53 – 7.41 (m, 1H), 7.33 (d, *J* = 8.1 Hz, 2H), 2.37 (s, 3H); <sup>13</sup>C NMR (100 MHz, DMSO-*d*<sub>6</sub>) δ 162.3, 152.2, 148.8, 141.4, 134.5, 129.9, 129.1, 127.6, 127.4, 126.3, 125.8, 120.9, 20.9; MS (ESI): 237.00 [M+H]<sup>+</sup>.

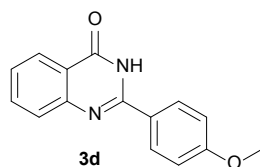

*2-(4-methoxyphenyl)quinazolin-4(3H)-one (3d)*<sup>1</sup>. white solid, 37% yield, mp. 248 – 251 °C. <sup>1</sup>H NMR (300 MHz, DMSO-*d*<sub>6</sub>) δ 12.39 (brs, 1H), 8.18 (d, *J* = 8.9 Hz, 2H), 8.12 (dd, *J* = 7.9, 1.1 Hz, 1H), 7.86 – 7.75 (m, 1H), 7.69 (d, *J* = 7.7 Hz, 1H), 7.52 – 7.41 (m, 1H), 7.07 (d, *J* = 8.9 Hz, 2H), 3.83 (s, 3H); <sup>13</sup>C NMR (100 MHz, DMSO-*d*<sub>6</sub>) δ 162.3, 161.8, 151.8, 148.9, 134.5, 129.4, 127.3, 126.1, 125.8, 124.8, 120.7, 114.0, 55.4; MS (ESI): 253.00 [M+H]<sup>+</sup>.

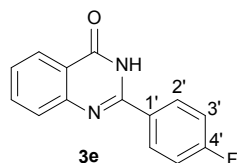

2-(4-fluorophenyl)quinazolin-4(3H)-one (**3e**)<sup>1</sup>. white solid, 40% yield, mp. 284 – 287 °C. <sup>1</sup>H NMR (300 MHz, DMSO-*d*<sub>6</sub>) δ 12.56 (brs, 1H), 8.30 – 8.19 (m, 2H), 8.14 (dd, *J* = 7.9, 1.1 Hz, 1H), 7.87 – 7.78 (m, 1H), 7.72 (d, *J* = 7.7 Hz, 1H), 7.56 – 7.45 (m, 1H), 7.38 (t, *J* = 8.9 Hz, 2H); <sup>13</sup>C NMR (100 MHz, DMSO-*d*<sub>6</sub>) δ 164.0 (d, *J*<sub>C4'-F</sub> = 249.5 Hz, C4'), 162.2, 151.4, 148.6, 134.6, 130.3 (d, *J*<sub>C2'-F</sub> = 9.0 Hz, C2'), 129.2 (d, *J*<sub>C1'-F</sub> = 2.9 Hz, C1'), 127.4, 126.6, 125.8, 120.9, 115.6 (d, *J*<sub>C3'-F</sub> = 21.9 Hz, C3'); MS (ESI): 240.95 [M+H]<sup>+</sup>.

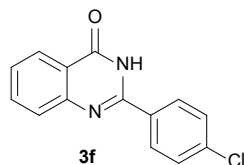

2-(4-chlorophenyl)quinazolin-4(3H)-one (**3f**)<sup>3</sup>. white solid, 45% yield, mp. 298 – 300 °C. <sup>1</sup>H NMR (300 MHz, DMSO-*d*<sub>6</sub>) δ 12.58 (brs, 1H), 8.28 – 8.08 (m, 3H), 7.83 (t, *J* = 7.4 Hz, 1H), 7.73 (d, *J* = 7.7 Hz, 1H), 7.61 (d, *J* = 8.2 Hz, 2H), 7.52 (t, *J* = 7.3 Hz, 1H); <sup>13</sup>C NMR (100 MHz, DMSO-*d*<sub>6</sub>) δ 162.2, 151.4, 148.5, 136.3, 134.6, 131.6, 129.6, 128.7, 127.4, 126.7, 125.9, 121.0; MS (ESI): 256.95 [M+H]<sup>+</sup>.

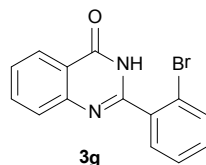

2-(2-bromophenyl)quinazolin-4(3H)-one (**3g**)<sup>4</sup>. white solid, 84% yield, mp. 165 – 167 °C. <sup>1</sup>H NMR (300 MHz, DMSO-*d*<sub>6</sub>) δ 12.61 (brs, 1H), 8.17 (dd, *J* = 7.9, 1.2 Hz, 1H), 7.84 (ddd, *J* = 8.5, 7.2, 1.6 Hz, 1H), 7.76 (dd, *J* = 7.8, 1.3 Hz, 1H), 7.70 (d, *J* = 7.7 Hz, 1H), 7.64 (dd, *J* = 7.4, 1.9 Hz, 1H), 7.59 – 7.41 (m, 3H); <sup>13</sup>C NMR (100 MHz, DMSO-*d*<sub>6</sub>) δ 161.4, 153.3, 148.5, 135.9, 134.5, 132.6, 131.6, 130.8, 127.6, 127.4, 127.0, 125.8, 121.3, 121.0; MS (ESI): 300.85 [M+H]<sup>+</sup>.

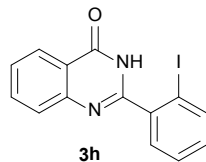

2-(2-iodophenyl)quinazolin-4(3H)-one (**3h**). yellow solid, 67% yield, mp. 217 – 219 °C. <sup>1</sup>H NMR (300 MHz, DMSO-*d*<sub>6</sub>) δ 12.55 (brs, 1H), 8.21 – 8.07 (m, 1H), 7.97 (d, *J* = 8.0 Hz, 1H), 7.89 – 7.78 (m, 1H), 7.69 (d, *J* = 8.0 Hz, 1H), 7.61 – 7.47 (m, 3H), 7.27 (td, *J* = 7.5, 2.1 Hz, 1H); <sup>13</sup>C NMR (100 MHz, DMSO-*d*<sub>6</sub>) δ 161.5, 155.2, 148.5, 139.6, 138.8, 134.5, 131.4, 129.8, 128.1, 127.4, 126.9, 125.8, 121.2, 96.4; MS (ESI): 348.85 [M+H]<sup>+</sup>; HRMS (ESI) *m/z* calcd for C<sub>14</sub>H<sub>10</sub>IN<sub>2</sub>O [M+H]<sup>+</sup> 348.9832, found 348.9833.

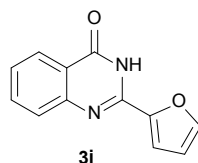

2-(furan-2-yl)quinazolin-4(3H)-one (**3i**)<sup>1</sup>. yellow solid, 76% yield, mp. 218 – 221 °C. <sup>1</sup>H NMR (300 MHz, DMSO-*d*<sub>6</sub>) δ 12.48 (brs, 1H), 8.11 (d, *J* = 7.5 Hz, 1H), 7.99 (s, 1H), 7.80 (t, *J* = 7.1 Hz, 1H), 7.67 (d, *J* = 8.0 Hz, 1H), 7.62 (d, *J* = 3.5 Hz, 1H), 7.48 (t, *J* = 7.5 Hz, 1H), 6.74 (dd, *J* = 3.4, 1.6 Hz, 1H);

$^{13}\text{C}$  NMR (100 MHz,  $\text{DMSO-}d_6$ )  $\delta$  161.5, 148.6, 146.5, 146.1, 144.0, 134.6, 127.2, 126.4, 125.9, 121.1, 114.5, 112.5; MS (ESI): 212.95  $[\text{M}+\text{H}]^+$ .

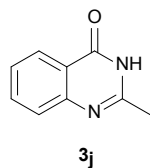

*2-methylquinazolin-4(3H)-one (3j)*<sup>5</sup>. white solid, 42% yield, mp. 237 – 239 °C.  $^1\text{H}$  NMR (300 MHz,  $\text{DMSO-}d_6$ )  $\delta$  12.17 (brs, 1H), 8.05 (dd,  $J = 7.9, 1.0$  Hz, 1H), 7.81 – 7.68 (m, 1H), 7.55 (d,  $J = 8.1$  Hz, 1H), 7.43 (t,  $J = 7.5$  Hz, 1H), 2.33 (s, 3H);  $^{13}\text{C}$  NMR (100 MHz,  $\text{DMSO-}d_6$ )  $\delta$  161.7, 154.2, 148.9, 134.2, 126.5, 125.8, 125.6, 120.6, 21.4; MS (ESI): 161.05  $[\text{M}+\text{H}]^+$ .

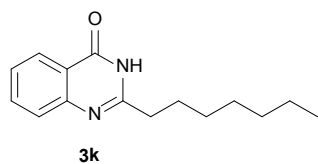

*2-heptylquinazolin-4(3H)-one (3k)*<sup>1</sup>. white solid, 60% yield, mp. 133 – 135 °C.  $^1\text{H}$  NMR (300 MHz,  $\text{DMSO-}d_6$ )  $\delta$  12.14 (brs, 1H), 8.11 – 8.00 (m, 1H), 7.80 – 7.67 (m, 1H), 7.57 (d,  $J = 8.0$  Hz, 1H), 7.43 (t,  $J = 7.5$  Hz, 1H), 2.66 – 2.52 (m, 2H), 1.81 – 1.63 (m, 2H), 1.34 – 1.11 (m, 8H), 0.83 (t,  $J = 6.6$  Hz, 3H);  $^{13}\text{C}$  NMR (100 MHz,  $\text{DMSO-}d_6$ )  $\delta$  161.8, 157.5, 148.9, 134.2, 126.7, 125.8, 125.6, 120.8, 34.5, 31.1, 28.4, 28.3, 26.7, 22.0, 13.9; MS (ESI): 245.05  $[\text{M}+\text{H}]^+$ .

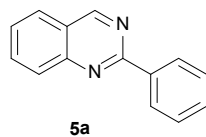

*2-phenylquinazoline (5a)*<sup>6</sup>. white solid, 70% yield, mp. 94 – 95 °C.  $^1\text{H}$  NMR (300 MHz,  $\text{CDCl}_3$ )  $\delta$  9.47 (s, 1H), 8.71 – 8.54 (m, 2H), 8.16 – 8.04 (m, 1H), 7.97 – 7.86 (m, 2H), 7.66 – 7.58 (m, 1H), 7.58 – 7.46 (m, 3H);  $^{13}\text{C}$  NMR (100 MHz,  $\text{CDCl}_3$ )  $\delta$  161.1, 160.5, 150.8, 138.1, 134.1, 130.6, 128.7, 128.6, 127.3, 127.1, 123.6; MS (ESI): 207.10  $[\text{M}+\text{H}]^+$ .

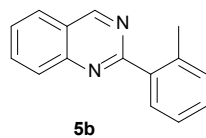

*2-(o-tolyl)quinazoline (5b)*<sup>7</sup>. yellow solid, 60% yield, mp. 36 – 37 °C.  $^1\text{H}$  NMR (300 MHz,  $\text{CDCl}_3$ )  $\delta$  9.50 (s, 1H), 8.10 (d,  $J = 8.5$  Hz, 1H), 8.01 – 7.86 (m, 3H), 7.75 – 7.56 (m, 1H), 7.44 – 7.29 (m, 3H), 2.62 (s, 3H);  $^{13}\text{C}$  NMR (100 MHz,  $\text{CDCl}_3$ )  $\delta$  164.0, 160.1, 150.4, 138.6, 137.4, 134.1, 131.3, 130.7, 129.3, 128.6, 127.5, 127.1, 126.0, 122.9, 21.1; MS (ESI): 221.10  $[\text{M}+\text{H}]^+$ .

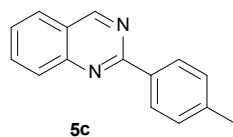

*2-(p-tolyl)quinazoline (5c)*<sup>6</sup>. yellow solid, 71% yield, mp. 103 – 104 °C.  $^1\text{H}$  NMR (300 MHz,  $\text{CDCl}_3$ )  $\delta$  9.45 (s, 1H), 8.52 (d,  $J = 8.2$  Hz, 2H), 8.07 (d,  $J = 8.5$  Hz, 1H), 7.89 (t,  $J = 7.9$  Hz, 2H), 7.59 (t,  $J = 7.5$  Hz, 1H), 7.35 (d,  $J = 8.2$  Hz, 2H), 2.45 (s, 3H);  $^{13}\text{C}$  NMR (100 MHz,  $\text{CDCl}_3$ )  $\delta$  161.2, 160.4, 150.8,

140.9, 135.4, 134.0, 129.4, 128.6, 127.1, 127.0, 123.5, 21.5; MS (ESI): 221.10 [M+H]<sup>+</sup>.

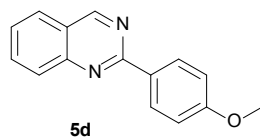

2-(4-methoxyphenyl)quinazoline (**5d**)<sup>6</sup>. yellow solid, 71% yield, mp. 86 – 87 °C. <sup>1</sup>H NMR (300 MHz, CDCl<sub>3</sub>) δ 9.42 (s, 1H), 8.75 – 8.45 (m, 2H), 8.05 (d, *J* = 8.9 Hz, 1H), 7.93 – 7.83 (m, 2H), 7.65 – 7.44 (m, 1H), 7.13 – 6.88 (m, 2H), 3.90 (s, 3H); <sup>13</sup>C NMR (100 MHz, CDCl<sub>3</sub>) δ 161.9, 160.9, 160.4, 150.9, 134.0, 130.8, 130.23, 128.4, 127.1, 126.8, 123.3, 114.0, 55.4; MS (ESI): 237.10 [M+H]<sup>+</sup>.

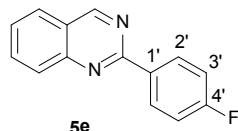

2-(4-fluorophenyl)quinazoline (**5e**)<sup>6</sup>. yellow solid, 55% yield, mp. 121 – 123 °C. <sup>1</sup>H NMR (300 MHz, CDCl<sub>3</sub>) δ 9.45 (s, 1H), 8.63 (dd, *J* = 8.1, 5.9 Hz, 2H), 8.07 (d, *J* = 8.5 Hz, 1H), 7.91 (t, *J* = 7.9 Hz, 2H), 7.62 (t, *J* = 7.5 Hz, 1H), 7.21 (t, *J* = 8.6 Hz, 2H); <sup>13</sup>C NMR (100 MHz, CDCl<sub>3</sub>) δ 164.7 (d, *J*<sub>C4'-F</sub> = 250.4 Hz, C4'), 160.5, 160.1, 150.7, 134.2 (d, *J*<sub>C1'-F</sub> = 2.9 Hz, C1'), 134.2, 130.7 (d, *J*<sub>C2'-F</sub> = 8.7 Hz, C2'), 128.6, 127.3, 127.1, 123.5, 115.6 (d, *J*<sub>C3'-F</sub> = 21.6 Hz, C3'); MS (ESI): 225.05 [M+H]<sup>+</sup>.

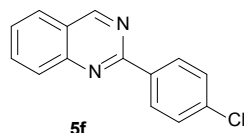

2-(4-chlorophenyl)quinazoline (**5f**)<sup>6</sup>. white solid, 62% yield, mp. 123 – 124 °C. <sup>1</sup>H NMR (300 MHz, CDCl<sub>3</sub>) δ 9.45 (s, 1H), 8.58 (d, *J* = 8.6 Hz, 2H), 8.08 (d, *J* = 8.3 Hz, 1H), 7.92 (t, *J* = 7.7 Hz, 2H), 7.63 (t, *J* = 7.5 Hz, 1H), 7.50 (d, *J* = 8.6 Hz, 2H); <sup>13</sup>C NMR (100 MHz, CDCl<sub>3</sub>) δ 160.5, 160.0, 150.7, 136.8, 136.5, 134.2, 129.9, 128.8, 128.6, 127.4, 127.1, 123.6; MS (ESI): 241.05 [M+H]<sup>+</sup>.

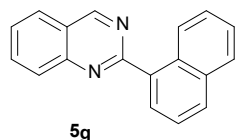

2-(naphthalen-1-yl)quinazoline (**5g**)<sup>7</sup>. yellow solid, 65% yield, mp. 115 – 117 °C. <sup>1</sup>H NMR (300 MHz, CDCl<sub>3</sub>) δ 9.61 (s, 1H), 8.76 – 8.65 (m, 1H), 8.25 – 8.14 (m, 2H), 8.08 – 7.89 (m, 4H), 7.76 – 7.68 (m, 1H), 7.64 (dd, *J* = 8.1, 7.3 Hz, 1H), 7.60 – 7.49 (m, 2H); <sup>13</sup>C NMR (100 MHz, CDCl<sub>3</sub>) δ 163.5, 160.4, 150.6, 136.3, 134.3, 134.2, 131.2, 130.4, 129.6, 128.7, 128.5, 127.7, 127.1, 126.9, 125.92, 125.89, 125.3, 123.1; MS (ESI): 257.05 [M+H]<sup>+</sup>.

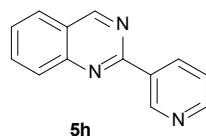

2-(pyridin-3-yl)quinazoline (**5h**)<sup>6</sup>. yellow solid, 35% yield, mp. 93 – 95 °C. <sup>1</sup>H NMR (300 MHz, CDCl<sub>3</sub>) δ 9.81 (s, 1H), 9.46 (s, 1H), 8.86 (d, *J* = 8.0 Hz, 1H), 8.73 (d, *J* = 4.6 Hz, 1H), 8.09 (d, *J* = 8.3 Hz, 1H), 7.92 (t, *J* = 7.7 Hz, 2H), 7.64 (t, *J* = 7.5 Hz, 1H), 7.45 (dd, *J* = 8.0, 4.8 Hz, 1H); <sup>13</sup>C NMR (100 MHz, CDCl<sub>3</sub>) δ 160.7, 159.2, 151.2, 150.6, 150.2, 135.8, 134.4, 133.6, 128.7, 127.8, 127.2, 123.8, 123.4; MS (ESI): 208.00 [M+H]<sup>+</sup>.

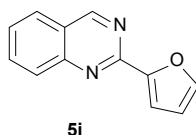

5i

2-(furan-2-yl)quinazoline (**5i**)<sup>6</sup>. yellow solid, 44% yield, mp. 130 – 133 °C. <sup>1</sup>H NMR (300 MHz, CDCl<sub>3</sub>) δ 9.37 (s, 1H), 8.09 (d, *J* = 9.0 Hz, 1H), 8.01 – 7.83 (m, 2H), 7.69 (d, *J* = 0.8 Hz, 1H), 7.64 – 7.54 (m, 1H), 7.52 – 7.40 (m, 1H), 6.61 (dd, *J* = 3.4, 1.7 Hz, 1H); <sup>13</sup>C NMR (100 MHz, CDCl<sub>3</sub>) δ 160.7, 154.1, 152.6, 150.5, 145.4, 134.5, 128.4, 127.3, 123.4, 114.1, 112.3; MS (ESI): 197.05 [M+H]<sup>+</sup>.

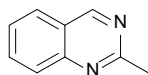

5j

2-methylquinazoline (**5j**)<sup>8</sup>. yellow oil, 53% yield. <sup>1</sup>H NMR (300 MHz, CDCl<sub>3</sub>) δ 9.29 (s, 1H), 7.92 (d, *J* = 8.8 Hz, 1H), 7.88 – 7.80 (m, 2H), 7.60 – 7.48 (m, 1H), 2.87 (s, 3H); <sup>13</sup>C NMR (100 MHz, CDCl<sub>3</sub>) δ 164.5, 160.4, 150.4, 134.1, 127.7, 127.1, 127.0, 122.9, 26.4; MS (ESI): 145.00 [M+H]<sup>+</sup>.

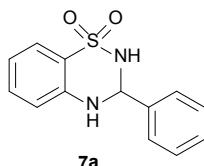

7a

3-phenyl-3,4-dihydro-2H-benzo[e][1,2,4]thiadiazine 1,1-dioxide (**7a**)<sup>9</sup>. white solid, 75% yield, mp. 129 – 132 °C. <sup>1</sup>H NMR (300 MHz, DMSO-*d*<sub>6</sub>) δ 7.87 (d, *J* = 12.0 Hz, 1H), 7.70 – 7.62 (m, 2H), 7.59 – 7.23 (m, 6H), 6.91 (d, *J* = 8.3 Hz, 1H), 6.76 (t, *J* = 7.5 Hz, 1H), 5.77 (d, *J* = 12.1 Hz, 1H); <sup>13</sup>C NMR (100 MHz, DMSO-*d*<sub>6</sub>) δ 143.9, 137.3, 132.8, 129.1, 128.5, 127.5, 123.7, 121.6, 116.7, 116.4, 68.4; MS (ESI): 261.05 [M+H]<sup>+</sup>.

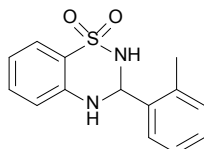

7b

3-(*o*-tolyl)-3,4-dihydro-2H-benzo[e][1,2,4]thiadiazine 1,1-dioxide (**7b**). white solid, 57% yield, mp. 179 – 181 °C. <sup>1</sup>H NMR (300 MHz, DMSO-*d*<sub>6</sub>) δ 7.78 (d, *J* = 12.0 Hz, 1H), 7.73 – 7.61 (m, 1H), 7.51 (d, *J* = 7.9 Hz, 1H), 7.44 – 7.15 (m, 5H), 6.93 (d, *J* = 8.3 Hz, 1H), 6.76 (t, *J* = 7.5 Hz, 1H), 5.95 (d, *J* = 12.0 Hz, 1H), 2.38 (s, 3H); <sup>13</sup>C NMR (100 MHz, DMSO-*d*<sub>6</sub>) δ 144.2, 135.8, 135.1, 132.7, 130.3, 128.8, 126.6, 126.0, 123.8, 121.7, 116.7, 116.5, 64.8, 18.4; MS (ESI): 274.95 [M+H]<sup>+</sup>; HRMS (ESI) *m/z* calcd for C<sub>14</sub>H<sub>15</sub>N<sub>2</sub>O<sub>2</sub>S [M+H]<sup>+</sup> 275.0849, found 275.0853.

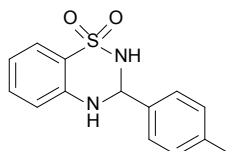

7c

3-(*p*-tolyl)-3,4-dihydro-2H-benzo[e][1,2,4]thiadiazine 1,1-dioxide (**7c**)<sup>9</sup>. white solid, 83% yield, mp. 150 – 153 °C. <sup>1</sup>H NMR (300 MHz, DMSO-*d*<sub>6</sub>) δ 7.81 (d, *J* = 12.1 Hz, 1H), 7.52 (t, *J* = 7.3 Hz, 3H), 7.38 – 7.20 (m, 4H), 6.89 (d, *J* = 8.2 Hz, 1H), 6.75 (t, *J* = 7.5 Hz, 1H), 5.72 (d, *J* = 12.1 Hz, 1H), 2.33

(s, 3H);  $^{13}\text{C}$  NMR (100 MHz,  $\text{DMSO-}d_6$ )  $\delta$  143.9, 138.5, 134.4, 132.8, 129.0, 127.4, 123.7, 121.6, 116.6, 116.3, 68.2, 20.8; MS (ESI): 274.95  $[\text{M}+\text{H}]^+$ .

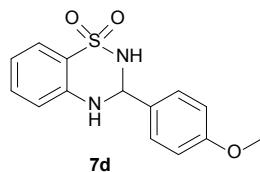

*3-(4-methoxyphenyl)-3,4-dihydro-2H-benzo[e][1,2,4]thiadiazine 1,1-dioxide (7d)*<sup>9</sup>. white solid, 58% yield, mp. 161 – 163 °C.  $^1\text{H}$  NMR (300 MHz,  $\text{DMSO-}d_6$ )  $\delta$  7.78 (d,  $J = 12.1$  Hz, 1H), 7.57 (d,  $J = 8.7$  Hz, 2H), 7.53 – 7.45 (m, 1H), 7.35 – 7.22 (m, 2H), 6.99 (d,  $J = 8.7$  Hz, 2H), 6.88 (d,  $J = 8.2$  Hz, 1H), 6.74 (t,  $J = 7.3$  Hz, 1H), 5.71 (d,  $J = 12.0$  Hz, 1H), 3.77 (s, 3H);  $^{13}\text{C}$  NMR (100 MHz,  $\text{DMSO-}d_6$ )  $\delta$  159.8, 143.9, 132.8, 129.5, 128.9, 123.7, 121.5, 116.6, 116.3, 113.8, 68.0, 55.2; MS (ESI): 290.95  $[\text{M}+\text{H}]^+$ .

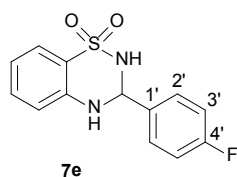

*3-(4-fluorophenyl)-3,4-dihydro-2H-benzo[e][1,2,4]thiadiazine 1,1-dioxide (7e)*<sup>9</sup>. white solid, 39% yield, mp. 184 – 186 °C.  $^1\text{H}$  NMR (300 MHz,  $\text{DMSO-}d_6$ )  $\delta$  7.89 (d,  $J = 12.0$  Hz, 1H), 7.71 (dd,  $J = 8.6$ , 5.6 Hz, 2H), 7.52 (d,  $J = 7.4$  Hz, 1H), 7.45 – 7.16 (m, 4H), 6.89 (d,  $J = 8.3$  Hz, 1H), 6.76 (t,  $J = 7.5$  Hz, 1H), 5.79 (d,  $J = 12.1$  Hz, 1H);  $^{13}\text{C}$  NMR (100 MHz,  $\text{DMSO-}d_6$ )  $\delta$  162.4 (d,  $J_{\text{C}4'-\text{F}} = 245.2$  Hz, C4'), 143.8, 133.7 (d,  $J_{\text{C}1'-\text{F}} = 3.0$  Hz, C1'), 132.9, 129.8 (d,  $J_{\text{C}2'-\text{F}} = 8.5$  Hz, C2'), 123.7, 121.6, 116.8, 116.3, 115.3 (d,  $J_{\text{C}3'-\text{F}} = 21.6$  Hz, C3'), 67.6; MS (ESI): 278.95  $[\text{M}+\text{H}]^+$ .

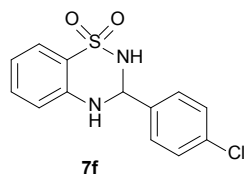

*3-(4-chlorophenyl)-3,4-dihydro-2H-benzo[e][1,2,4]thiadiazine 1,1-dioxide (7f)*<sup>9</sup>. white solid, 47% yield, mp. 199 – 210 °C.  $^1\text{H}$  NMR (300 MHz,  $\text{DMSO-}d_6$ )  $\delta$  7.92 (d,  $J = 12.0$  Hz, 1H), 7.68 (d,  $J = 8.5$  Hz, 2H), 7.59 – 7.45 (m, 3H), 7.38 (s, 1H), 7.35 – 7.25 (m, 1H), 6.89 (d,  $J = 8.0$  Hz, 1H), 6.76 (t,  $J = 7.2$  Hz, 1H), 5.80 (d,  $J = 12.0$  Hz, 1H);  $^{13}\text{C}$  NMR (100 MHz,  $\text{DMSO-}d_6$ )  $\delta$  143.8, 136.2, 133.7, 132.9, 129.5, 128.5, 123.7, 121.7, 116.9, 116.4, 67.6; MS (ESI): 294.90  $[\text{M}+\text{H}]^+$ .

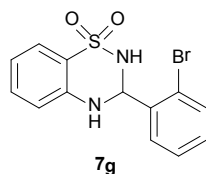

*3-(2-bromophenyl)-3,4-dihydro-2H-benzo[e][1,2,4]thiadiazine 1,1-dioxide (7g)*<sup>9</sup>. white solid, 51% yield, mp. 183 – 186 °C.  $^1\text{H}$  NMR (300 MHz,  $\text{DMSO-}d_6$ )  $\delta$  7.96 (d,  $J = 12.0$  Hz, 1H), 7.87 (d,  $J = 7.7$  Hz, 1H), 7.72 (d,  $J = 7.9$  Hz, 1H), 7.52 (t,  $J = 8.1$  Hz, 2H), 7.46 – 7.23 (m, 3H), 6.89 (d,  $J = 8.3$  Hz, 1H), 6.78 (t,  $J = 7.5$  Hz, 1H), 6.14 (d,  $J = 12.0$  Hz, 1H);  $^{13}\text{C}$  NMR (100 MHz,  $\text{DMSO-}d_6$ )  $\delta$  143.8, 135.9, 132.9, 132.8, 131.1, 129.4, 128.1, 123.8, 122.8, 121.8, 117.0, 116.4, 67.4; MS (ESI): 338.85  $[\text{M}+\text{H}]^+$ .



HRMS (ESI)  $m/z$  calcd for  $C_{13}H_{12}BrN_2O_2S$   $[M+H]^+$  338.9797, found 338.9789.

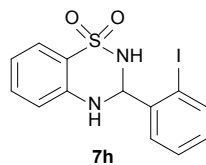

3-(2-iodophenyl)-3,4-dihydro-2H-benzo[e][1,2,4]thiadiazine 1,1-dioxide (**7h**). white solid, 52% yield, mp. 209 – 211 °C.  $^1H$  NMR (300 MHz,  $DMSO-d_6$ )  $\delta$  7.95 (d,  $J = 7.8$  Hz, 1H), 7.89 (d,  $J = 12.0$  Hz, 1H), 7.81 (d,  $J = 7.0$  Hz, 1H), 7.51 (t,  $J = 8.0$  Hz, 2H), 7.42 (s, 1H), 7.32 (t,  $J = 7.8$  Hz, 1H), 7.19 (t,  $J = 7.1$  Hz, 1H), 6.89 (d,  $J = 8.3$  Hz, 1H), 6.78 (t,  $J = 7.5$  Hz, 1H), 6.00 (d,  $J = 11.9$  Hz, 1H);  $^{13}C$  NMR (100 MHz,  $DMSO-d_6$ )  $\delta$  143.8, 139.4, 138.9, 132.9, 131.2, 128.9, 128.6, 123.8, 121.8, 116.9, 116.4, 99.8, 72.4; MS (ESI): 386.80  $[M+H]^+$ ; HRMS (ESI)  $m/z$  calcd for  $C_{13}H_{12}IN_2O_2S$   $[M+H]^+$  386.9659, found 386.9649.

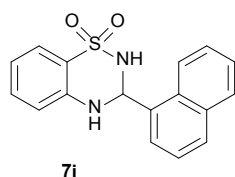

3-(naphthalen-1-yl)-3,4-dihydro-2H-benzo[e][1,2,4]thiadiazine 1,1-dioxide (**7i**). white solid, 44% yield, mp. 208 – 210 °C.  $^1H$  NMR (300 MHz,  $DMSO-d_6$ )  $\delta$  8.16 (d,  $J = 8.3$  Hz, 1H), 8.10 – 7.97 (m, 3H), 7.95 (d,  $J = 7.2$  Hz, 1H), 7.70 – 7.48 (m, 5H), 7.39 – 7.30 (m, 1H), 7.01 (d,  $J = 8.3$  Hz, 1H), 6.80 (t,  $J = 7.4$  Hz, 1H), 6.57 (d,  $J = 11.9$  Hz, 1H);  $^{13}C$  NMR (100 MHz,  $DMSO-d_6$ )  $\delta$  144.2, 133.3, 132.9, 132.2, 130.0, 129.5, 128.7, 126.9, 126.1, 125.2, 124.7, 123.8, 122.8, 121.8, 116.9, 116.8, 64.4; MS (ESI): 311.00  $[M+H]^+$ ; HRMS (ESI)  $m/z$  calcd for  $C_{17}H_{15}N_2O_2S$   $[M+H]^+$  311.0849, found 311.0843.

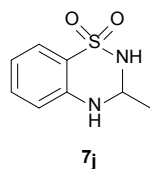

3-methyl-3,4-dihydro-2H-benzo[e][1,2,4]thiadiazine 1,1-dioxide (**7j**)<sup>10</sup>. white solid, 24% yield, mp. 211 – 213 °C.  $^1H$  NMR (300 MHz,  $DMSO-d_6$ )  $\delta$  7.43 (d,  $J = 9.1$  Hz, 2H), 7.32 – 7.20 (m, 1H), 7.08 (s, 1H), 6.75 (d,  $J = 8.3$  Hz, 1H), 6.68 (t,  $J = 7.5$  Hz, 1H), 4.80 (dq,  $J = 12.0, 6.0$  Hz, 1H), 1.40 (d,  $J = 6.1$  Hz, 3H);  $^{13}C$  NMR (100 MHz,  $DMSO-d_6$ )  $\delta$  143.8, 132.7, 123.6, 120.8, 116.1, 115.7, 61.8, 20.0; MS (ESI): 198.95  $[M+H]^+$ .

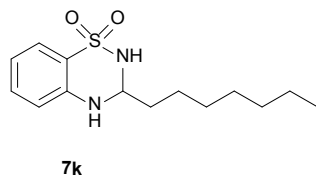

3-heptyl-3,4-dihydro-2H-benzo[e][1,2,4]thiadiazine 1,1-dioxide (**7k**). white solid, 29% yield, mp. 146 – 147 °C.  $^1H$  NMR (300 MHz,  $DMSO-d_6$ )  $\delta$  7.42 (d,  $J = 7.9$  Hz, 1H), 7.33 (d,  $J = 11.8$  Hz, 1H), 7.29 – 7.19 (m, 1H), 6.97 (s, 1H), 6.78 (d,  $J = 8.3$  Hz, 1H), 6.67 (t,  $J = 7.5$  Hz, 1H), 4.75 – 4.47 (m, 1H), 1.79 – 1.64 (m, 2H), 1.44 (s, 2H), 1.34 – 1.21 (m, 8H), 0.91 – 0.82 (m, 3H);  $^{13}C$  NMR (100 MHz,  $DMSO-d_6$ )  $\delta$  143.7, 132.6, 123.7, 121.2, 116.1, 115.8, 65.6, 33.4, 31.1, 28.6, 28.5, 24.1, 22.1, 13.9; MS (ESI):

283.00 [M+H]<sup>+</sup>; HRMS (ESI) m/z calcd for C<sub>14</sub>H<sub>23</sub>N<sub>2</sub>O<sub>2</sub>S [M+H]<sup>+</sup> 283.1475, found 283.1470.

## References

1. A. J. A. Watson, A. C. Maxwell and J. M. J. Williams, *Org. Biomol. Chem.*, 2012, **10**, 240–243.
2. H. Hikawa, Y. Ino, H. Suzuki and Y. Yokoyama, *J. Org. Chem.*, 2012, **77**, 7046–7051.
3. W. Xu, Y. Jin, H. Liu, Y. Jiang, Fu and Hua, *Org. Lett.*, 2011, **13**, 1274–1277.
4. Y. Zheng, M. Bian, X.-Q. Deng, S.-B. Wang and Z.-S. Quan, *Arch. Pharm.*, 2013, **346**, 119–126.
5. X. Zhang, D. Ye, H. Sun, D. Guo, J. Wang, H. Huang, X. Zhang, H. Jiang and H. Liu, *Green Chem.*, 2009, **11**, 1881–1888.
6. B. Han, X.-L. Yang, C. Wang, Y.-W. Bai, T.-C. Pan, X. Chen and W. Yu, *J. Org. Chem.*, 2011, **77**, 1136–1142.
7. H. Yuan, W.-J. Yoo, H. Miyamura and S. Kobayashi, *Adv. Synth. Catal.*, 2012, **354**, 2899–2904.
8. C. Huang, Y. Fu, H. Fu, Y. Jiang and Y. Zhao, *Chem. Commun.*, 2008, 6333–6335.
9. J. M. Loynes, H. F. Ridley and R. G. W. Spickett, *J. Med. Chem.*, 1965, **8**, 691–694.
10. G. Cannazza, D. Braghiroli, P. Iuliani and C. Parenti, *Tetrahedron: Asymmetry*, 2006, **17**, 3158–3162.

### <sup>1</sup>H- and <sup>13</sup>C-NMR spectral data for products

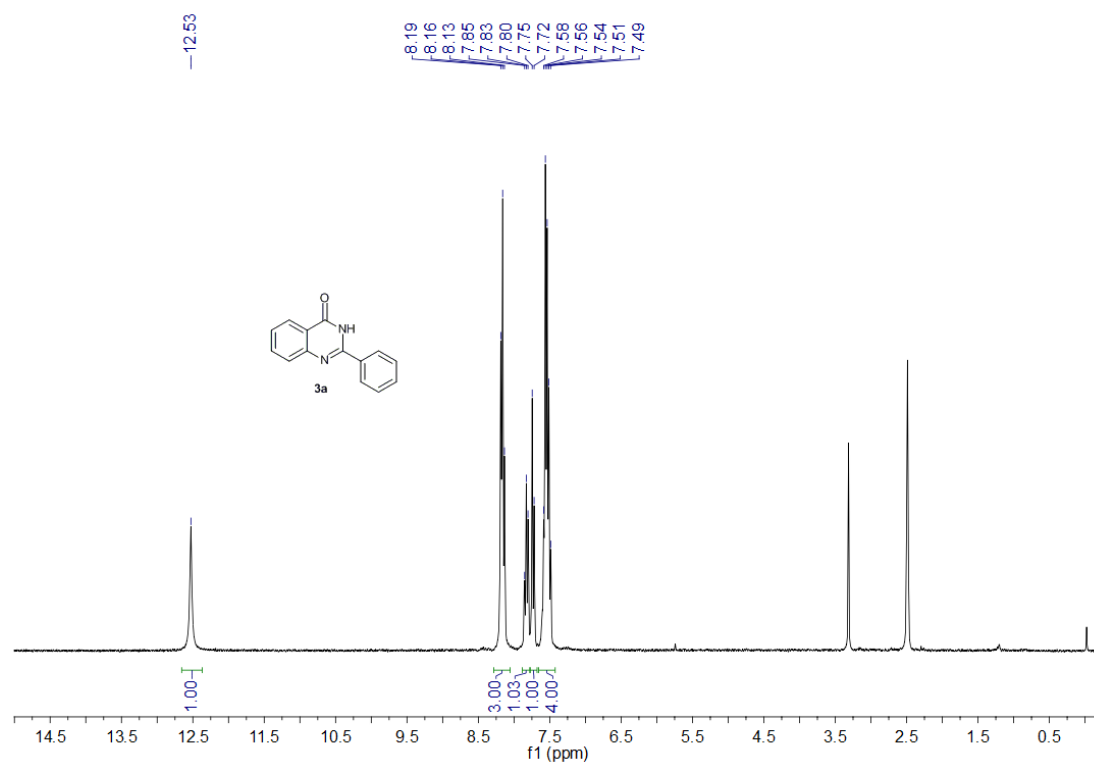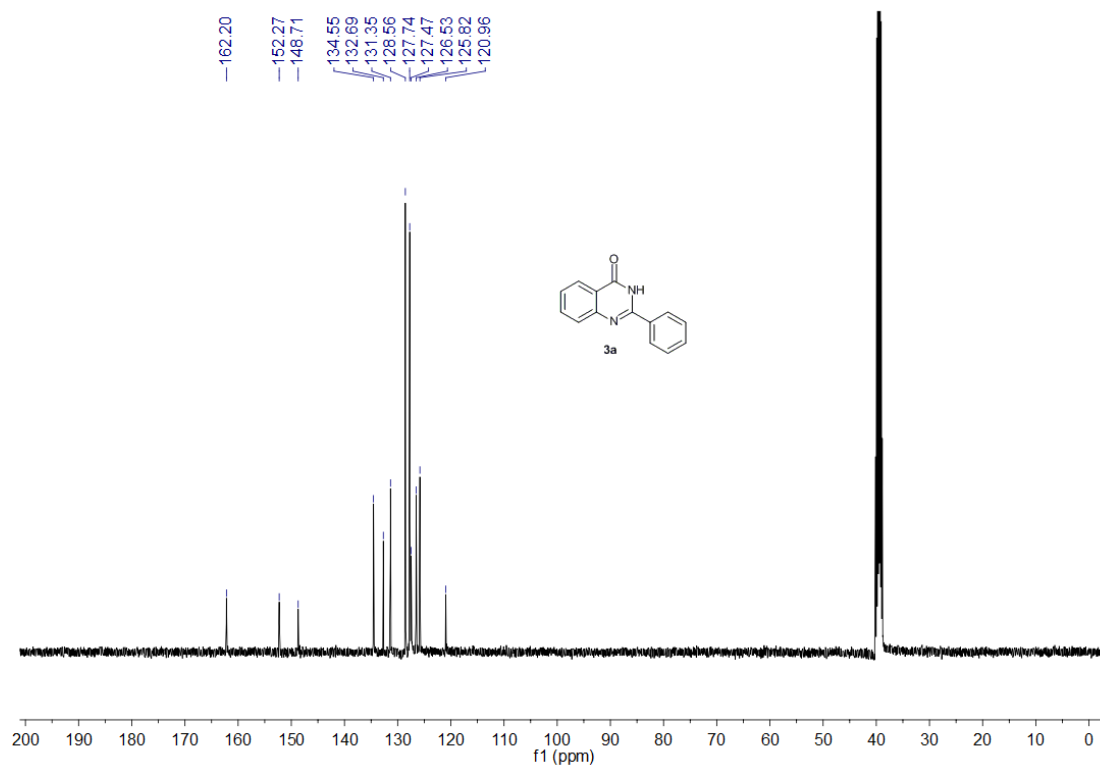

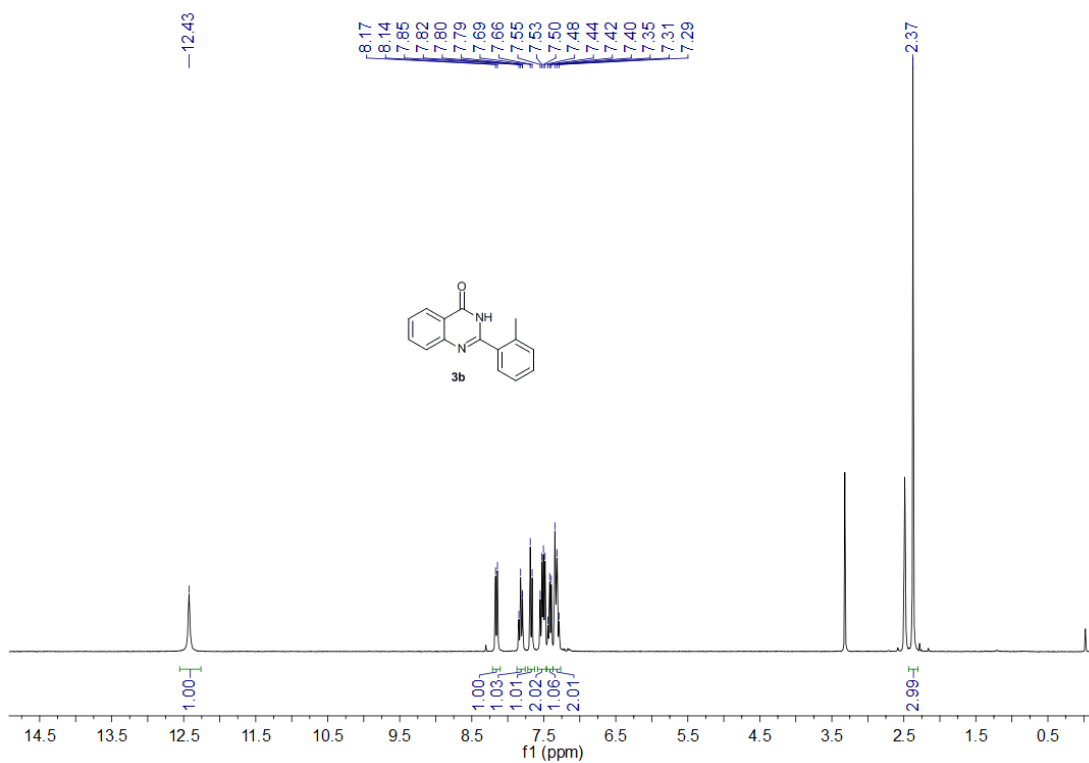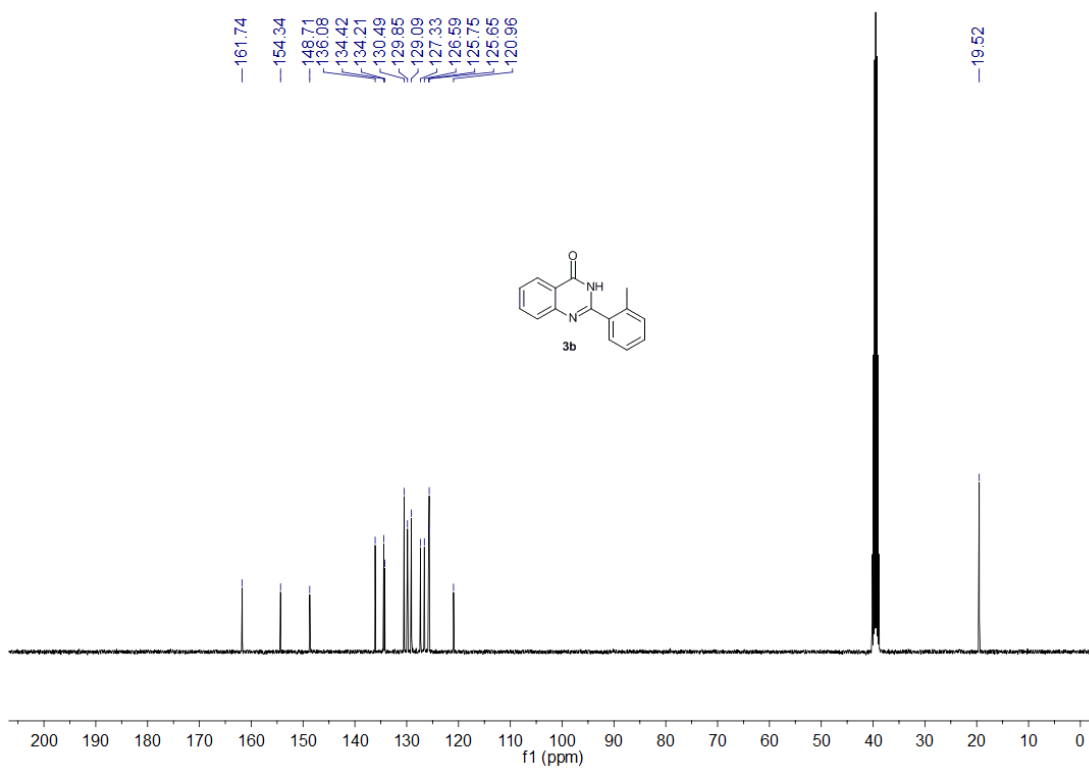

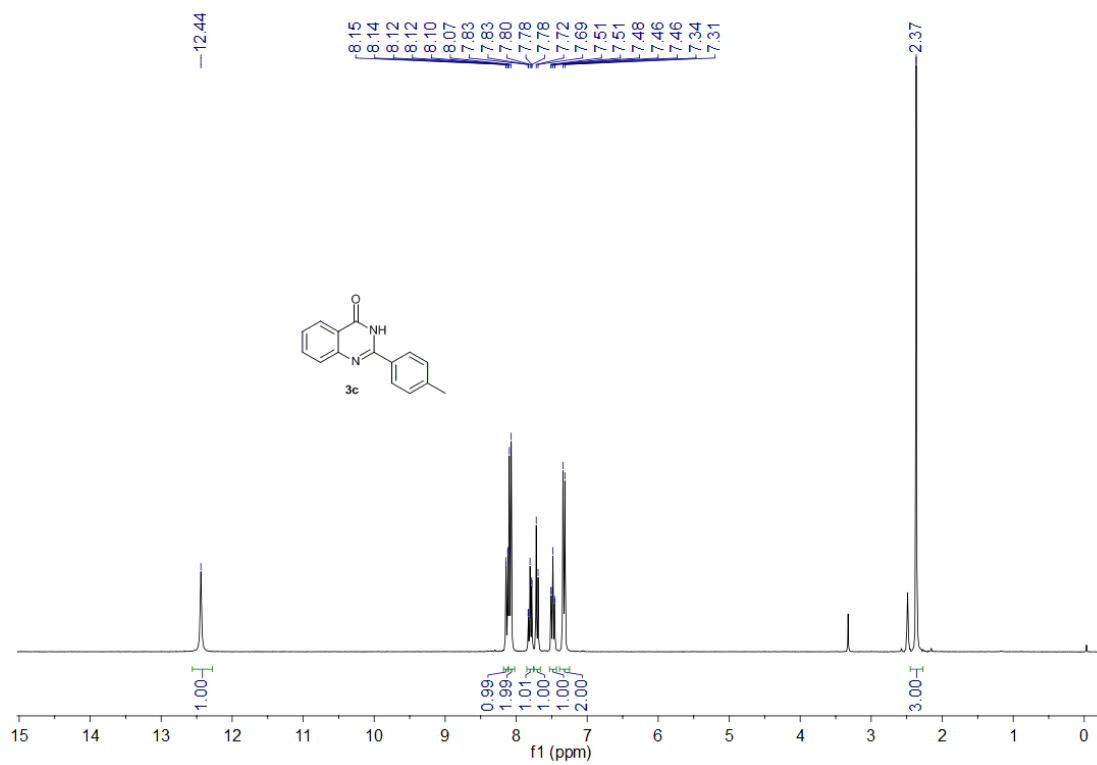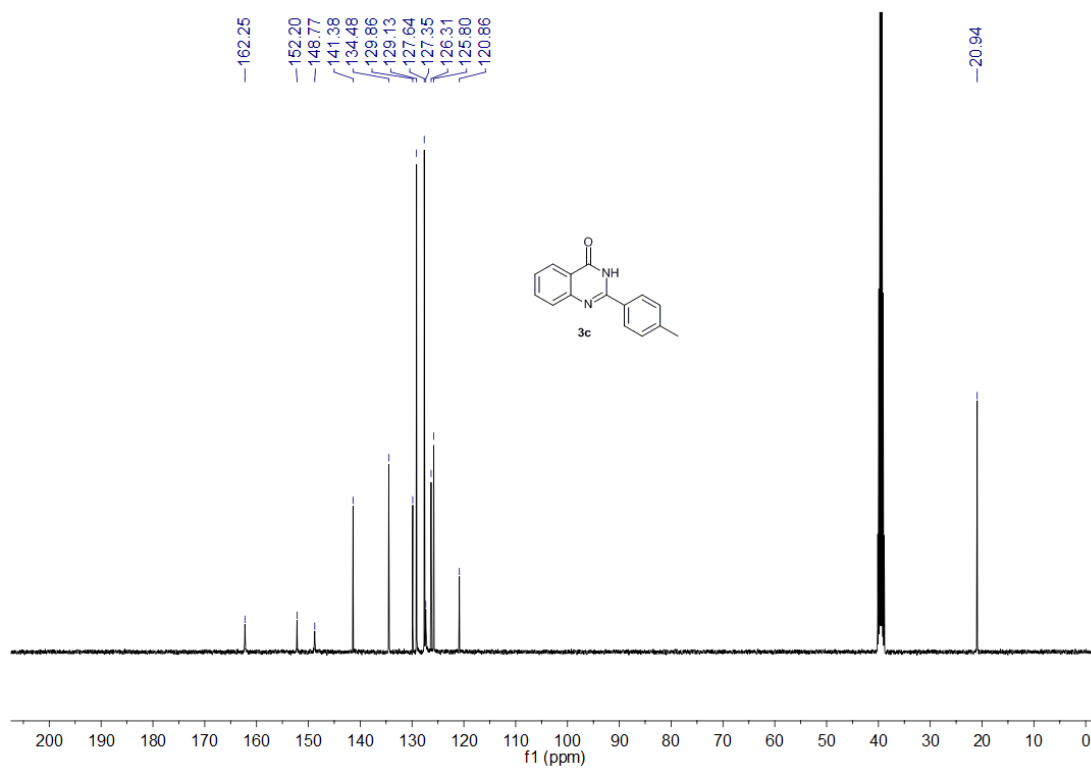

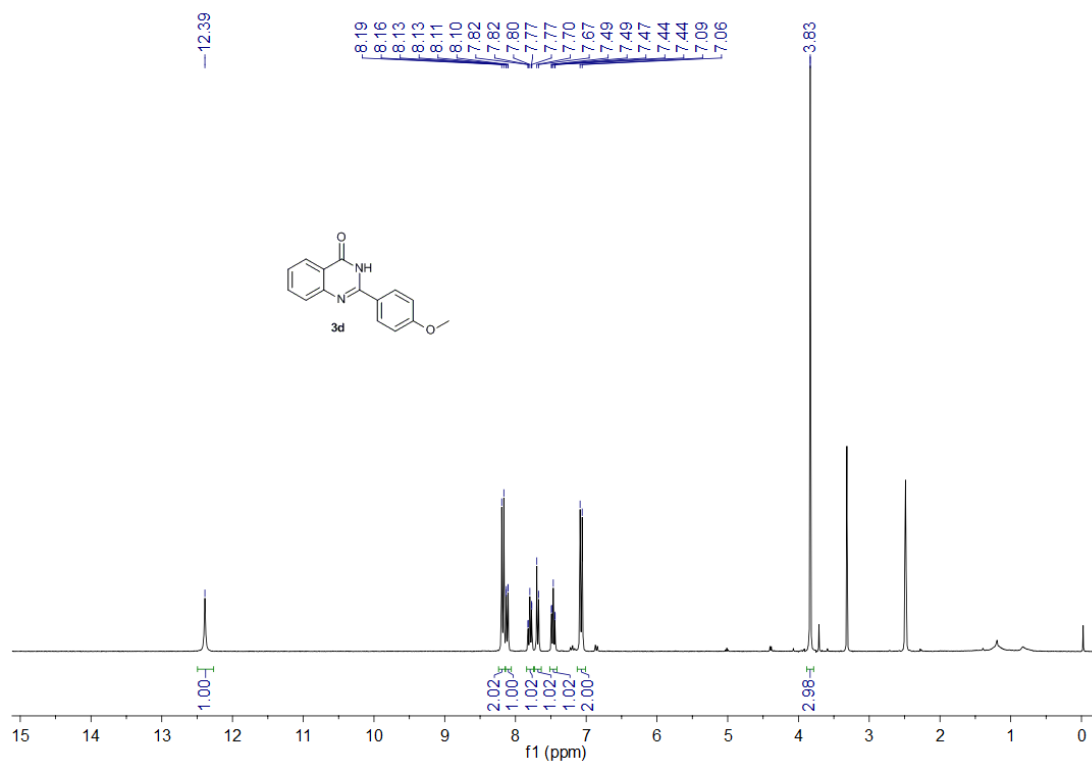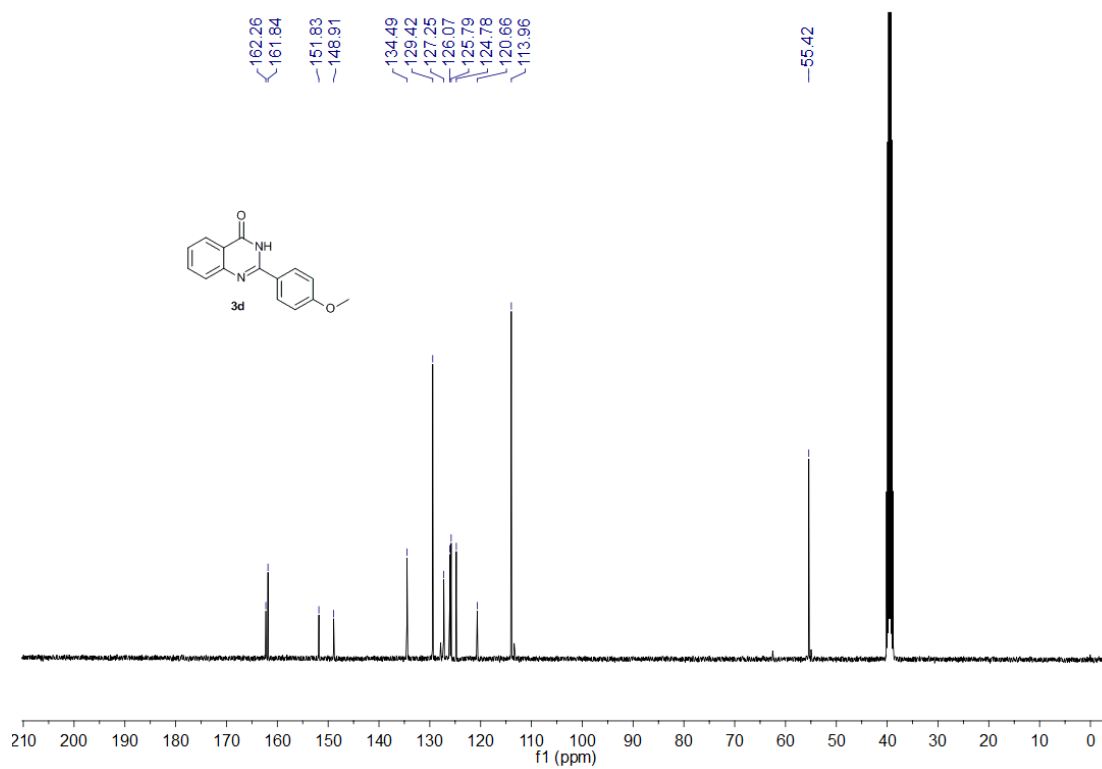

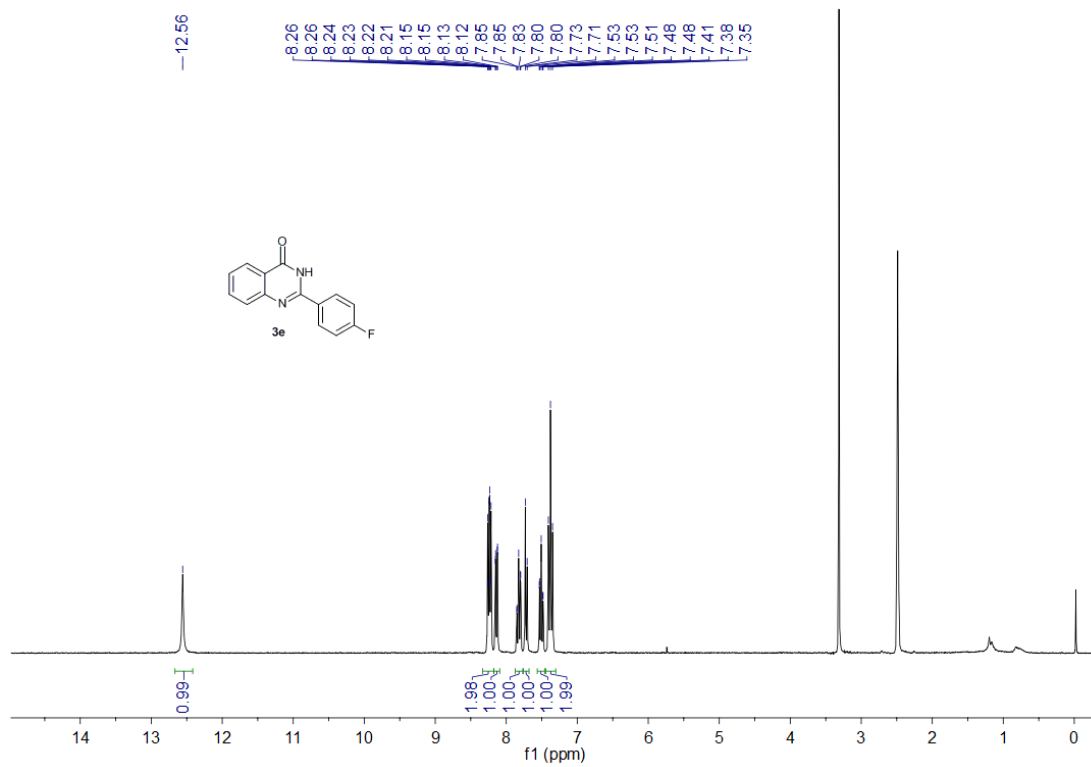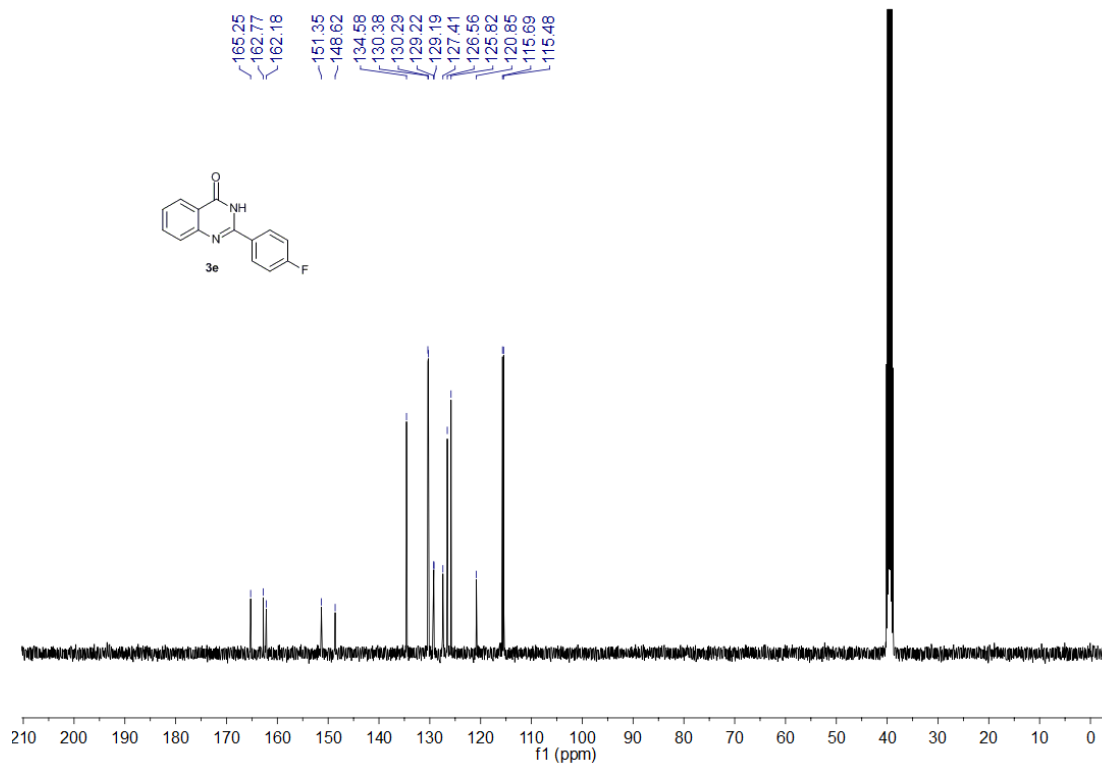

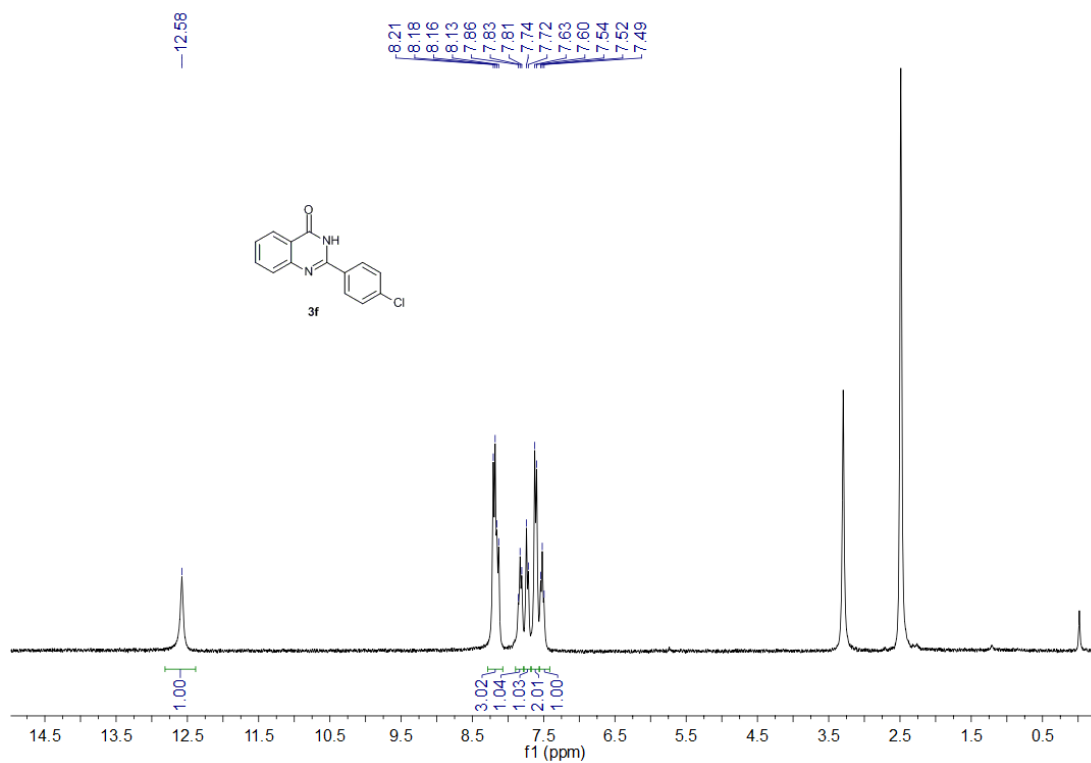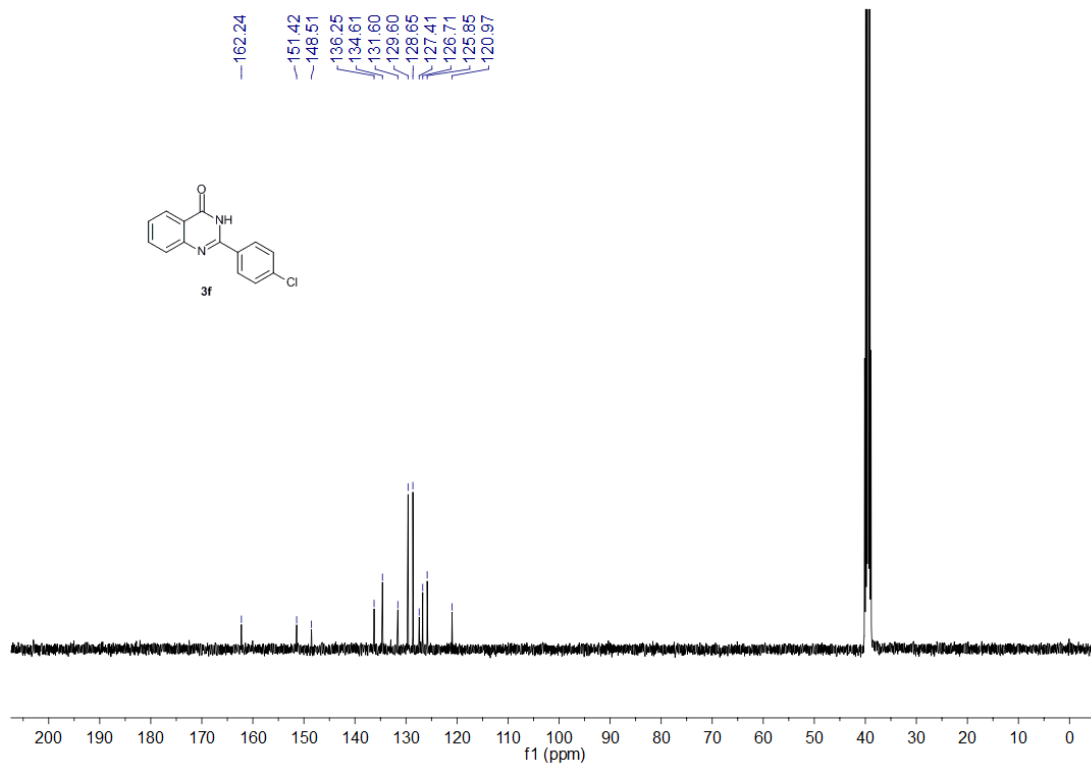



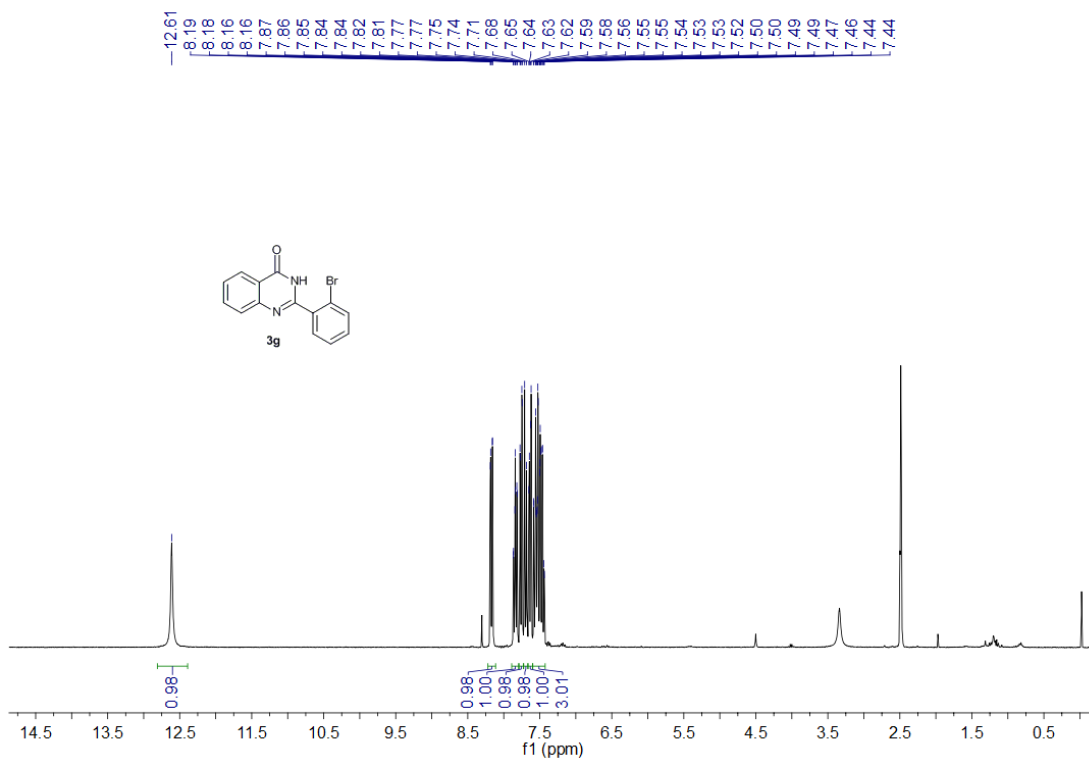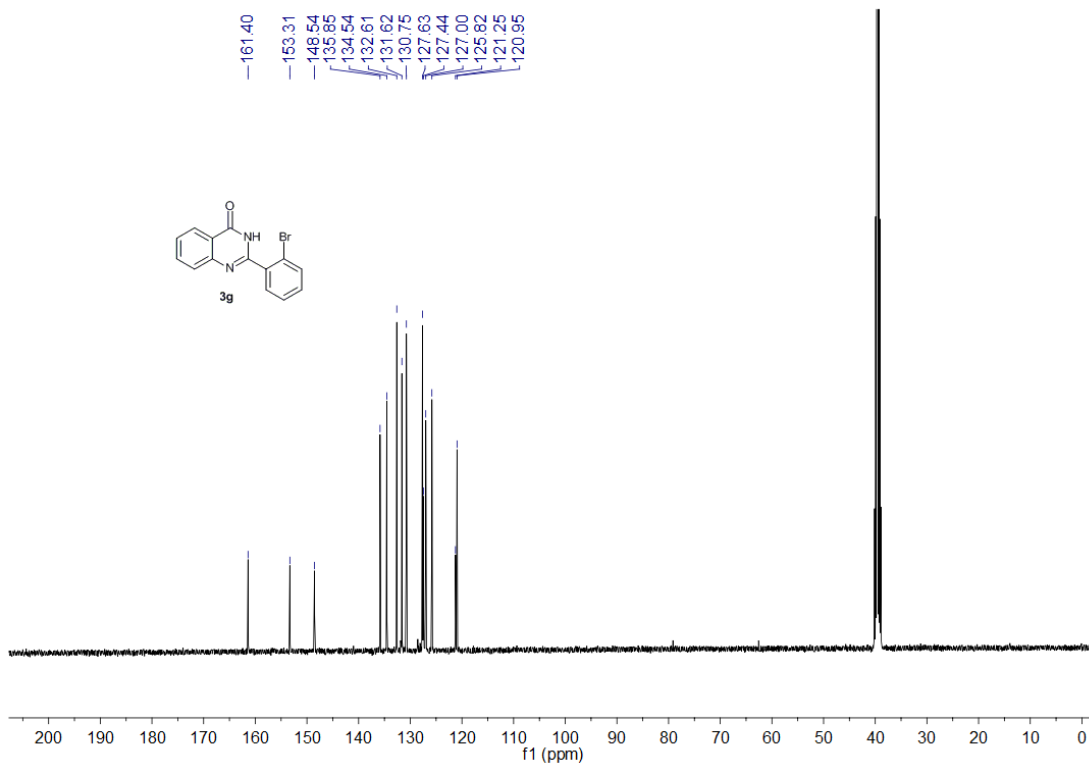

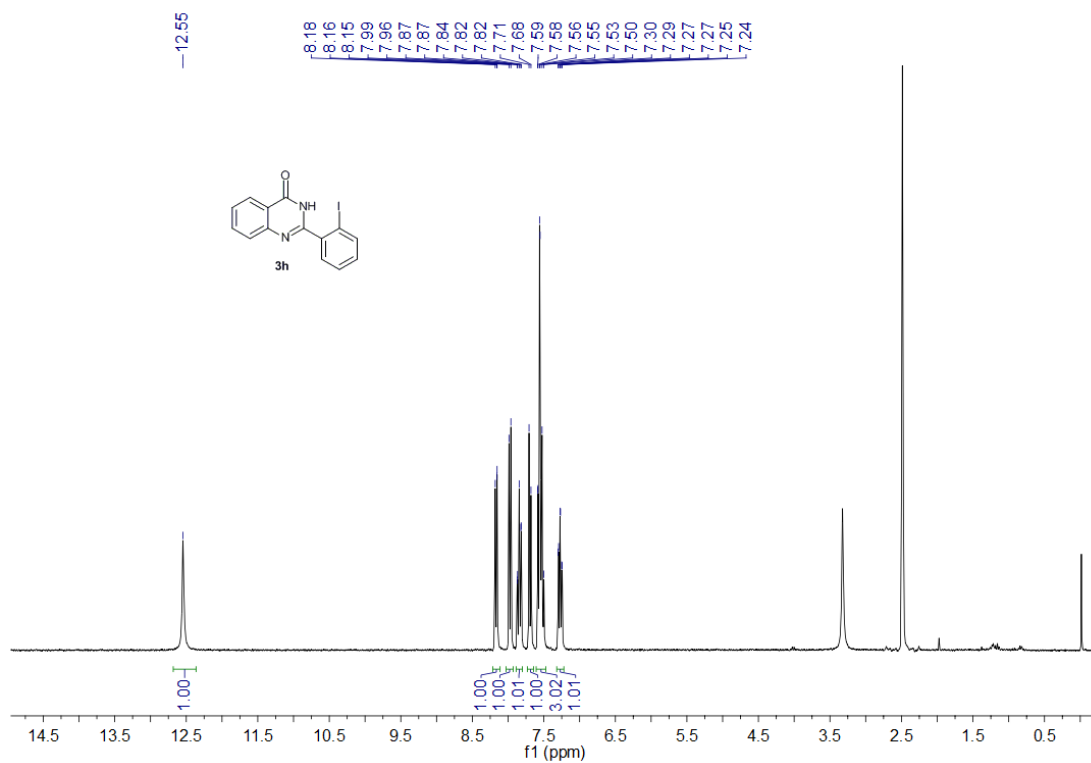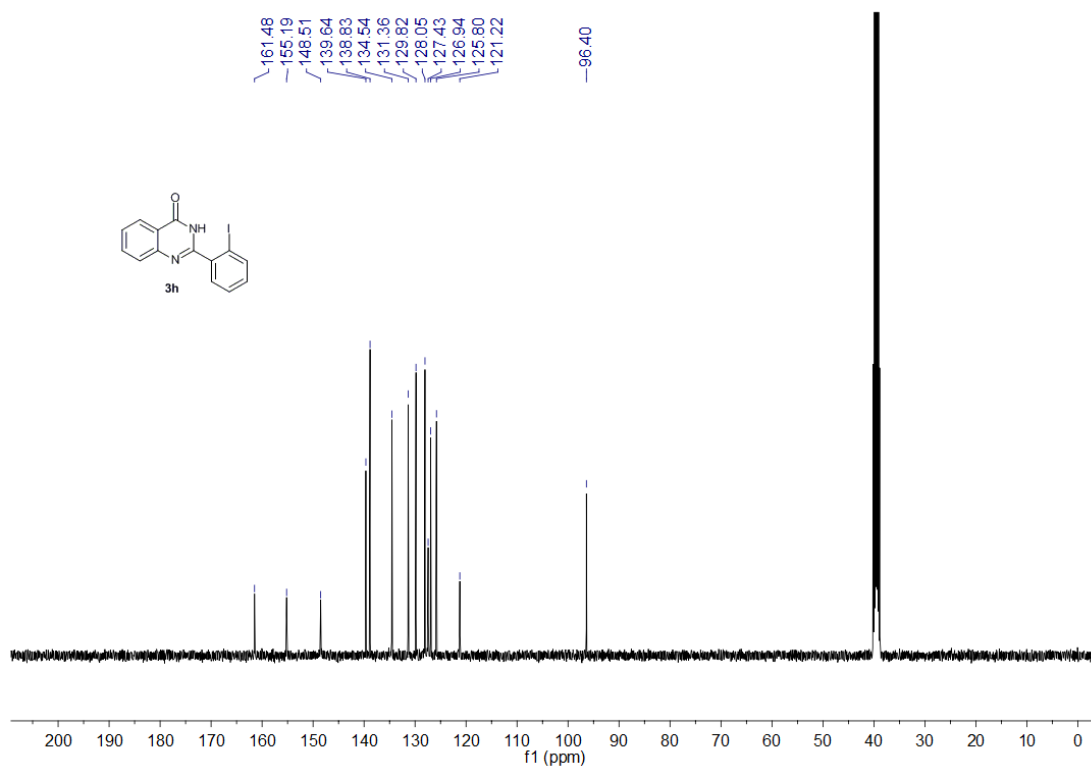

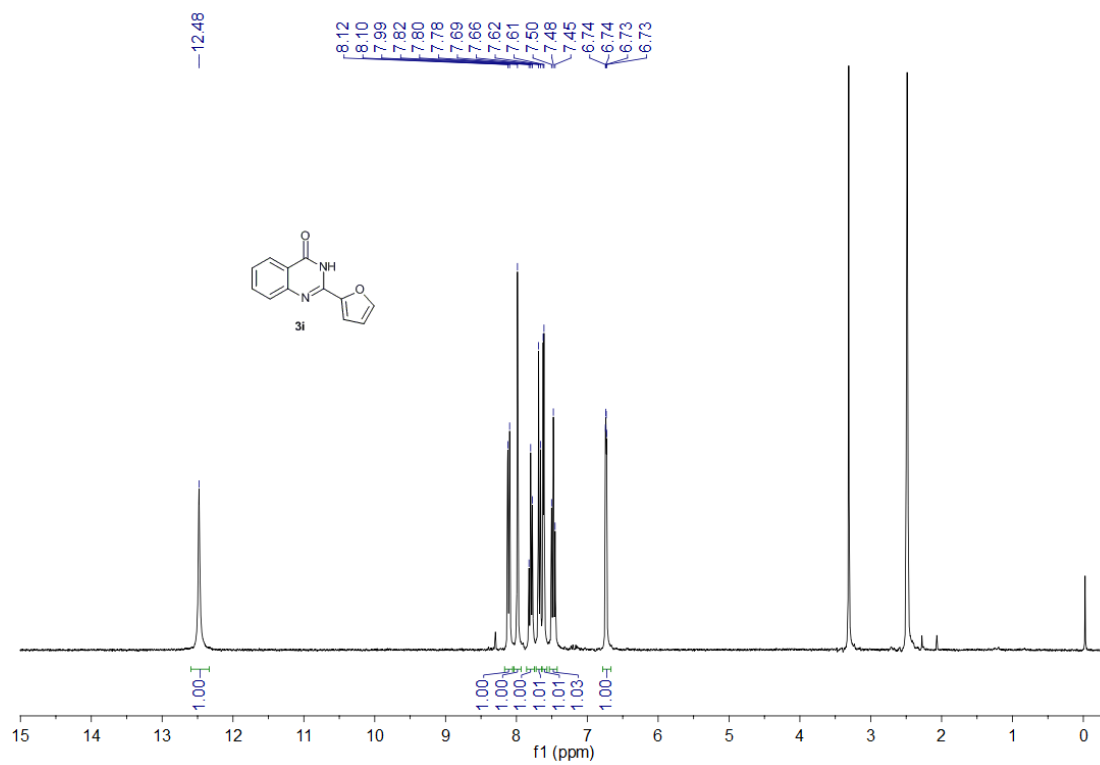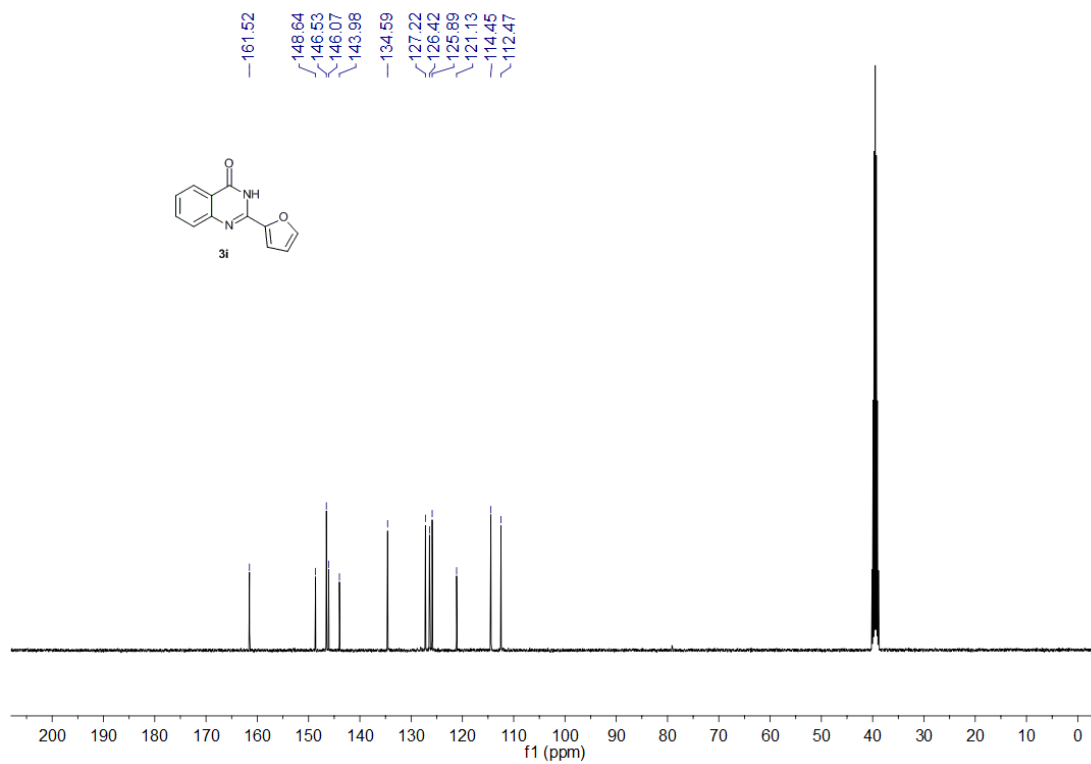

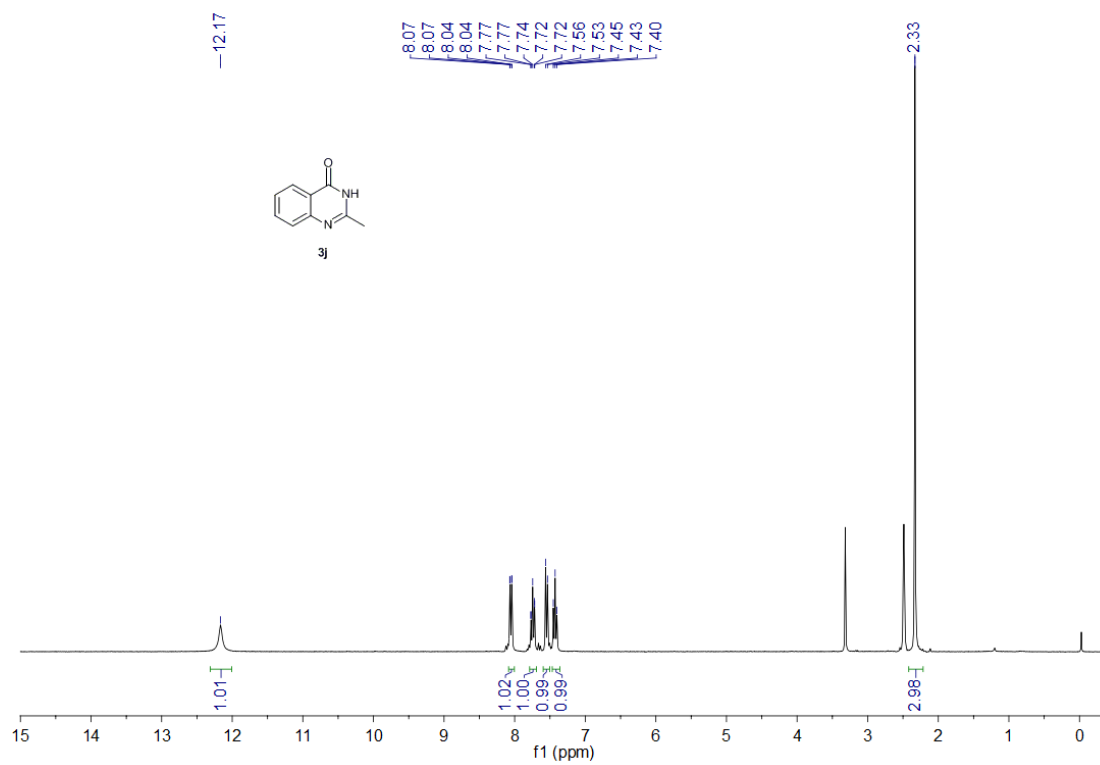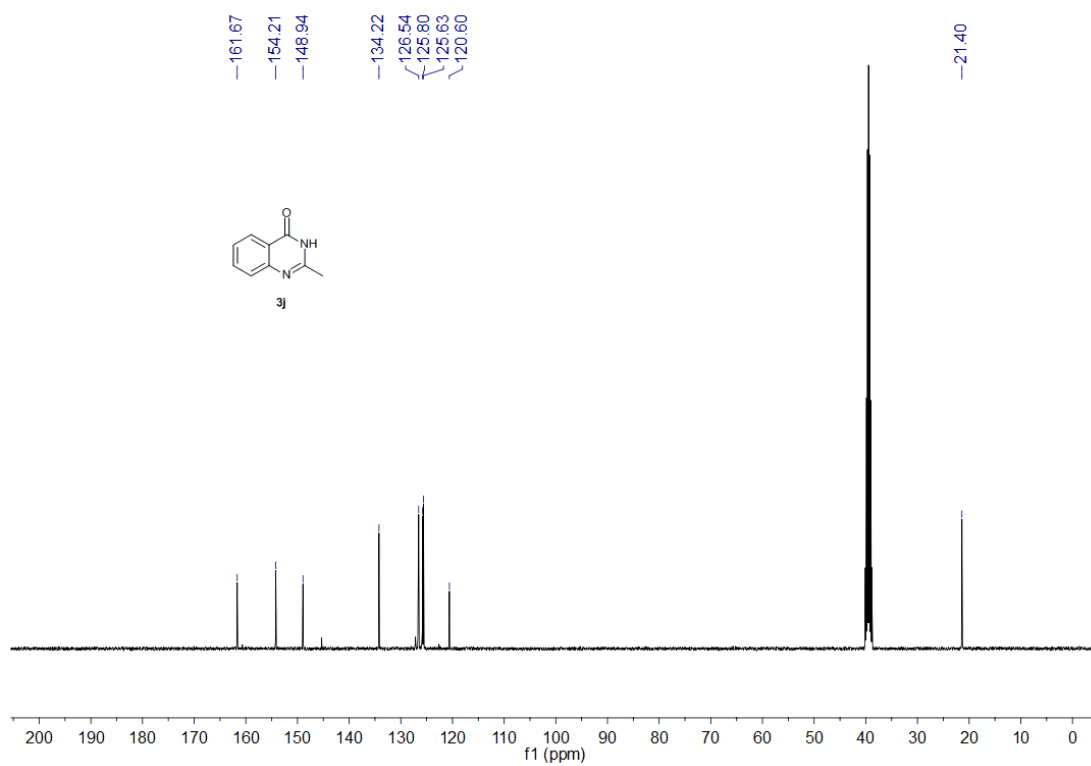

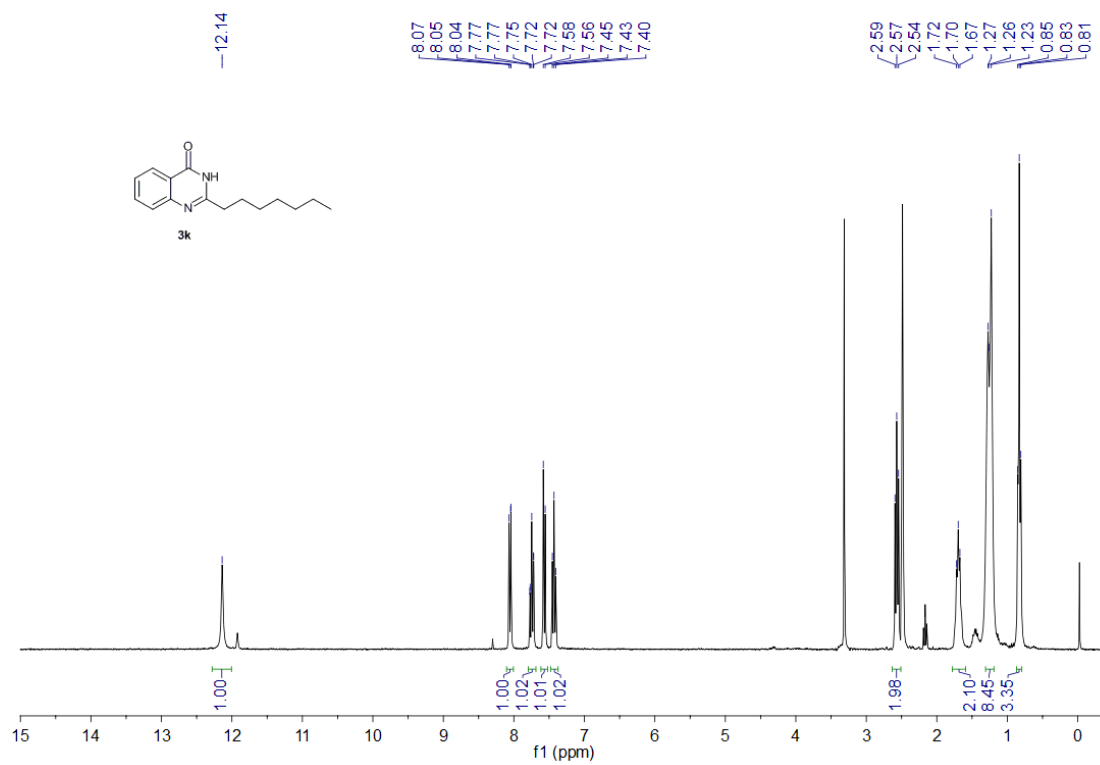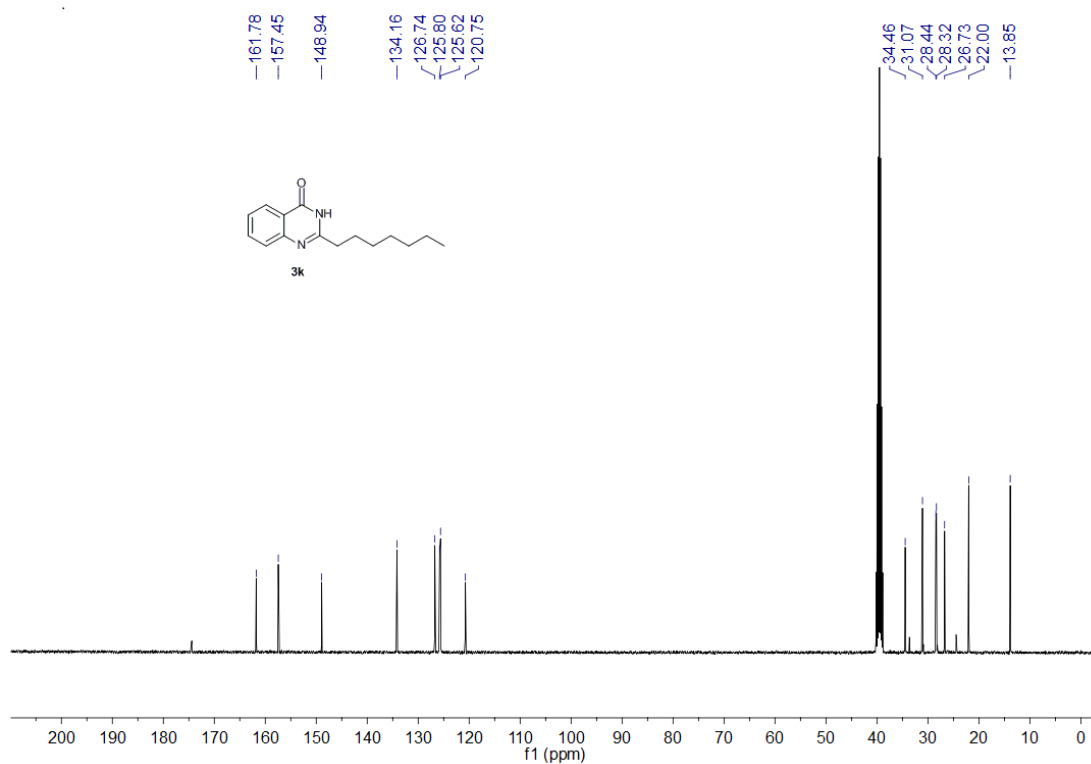

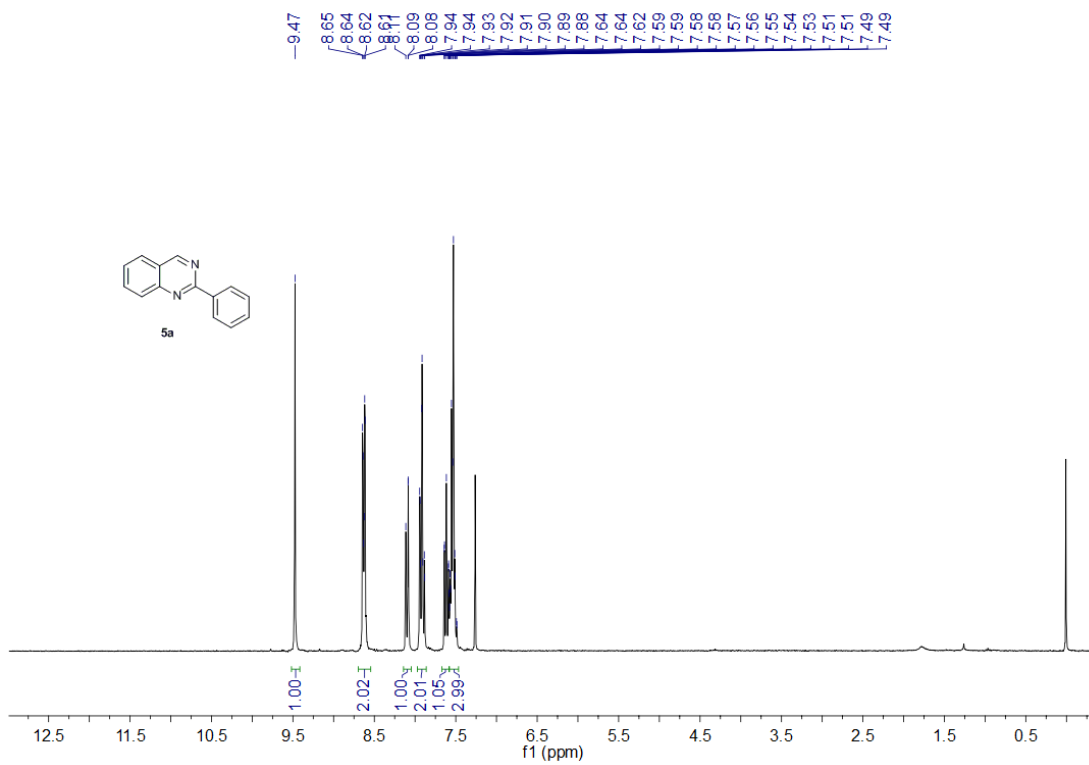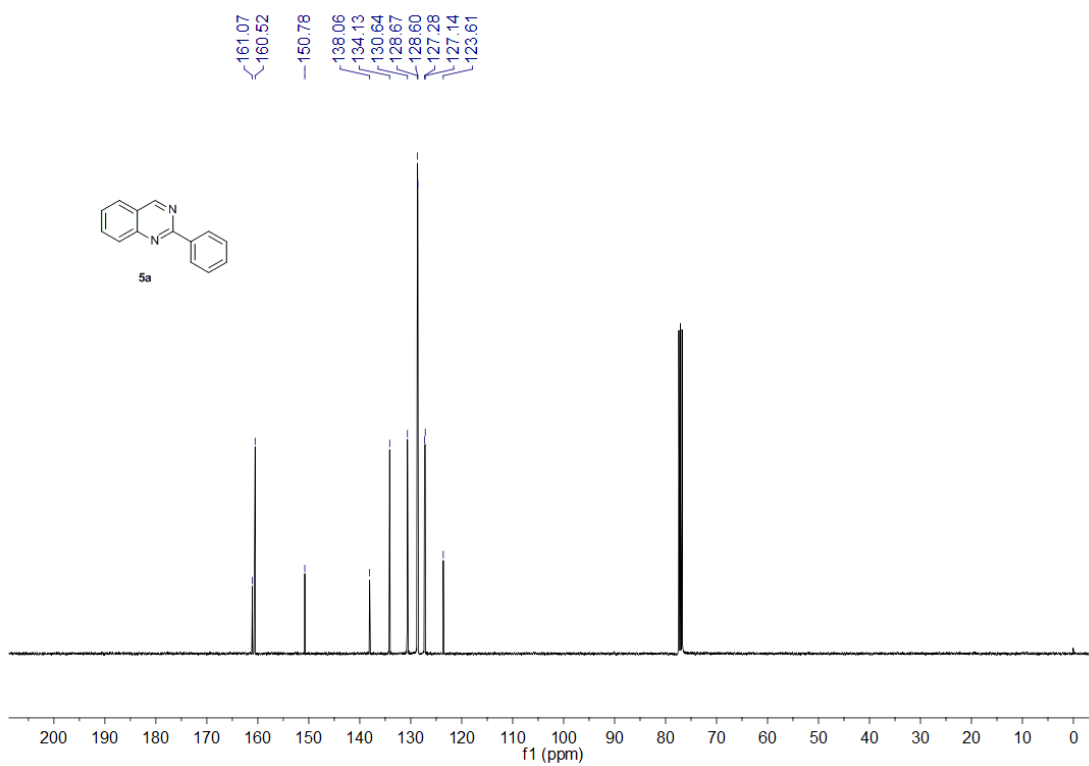

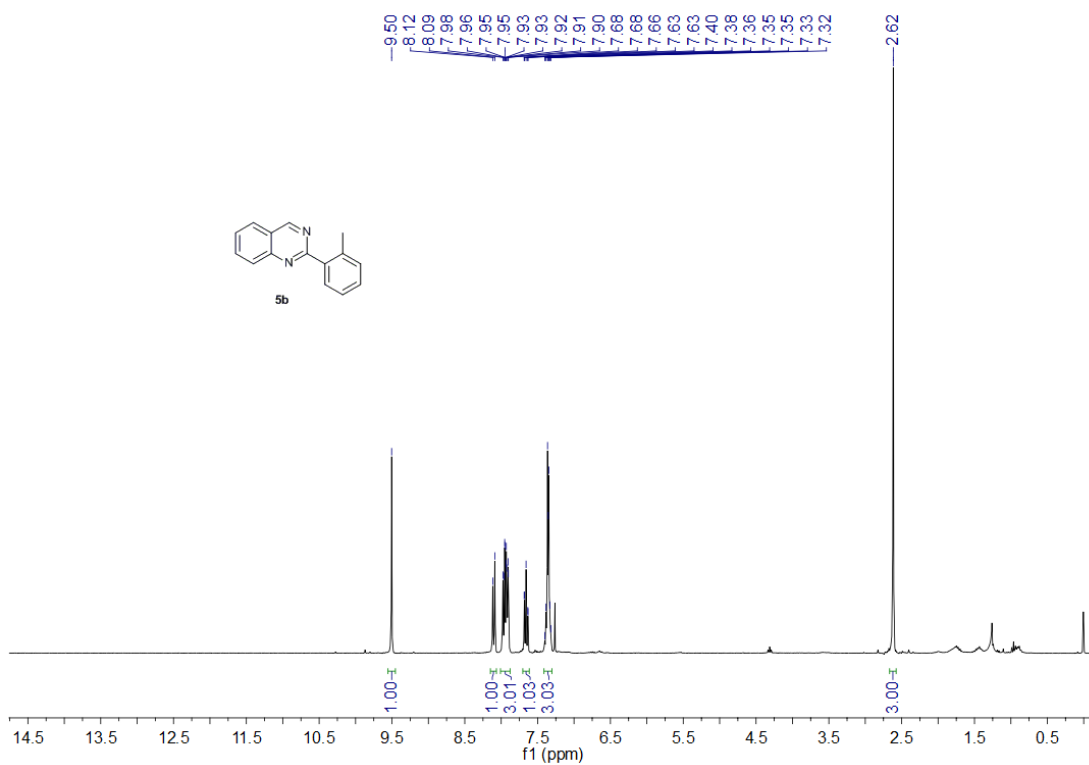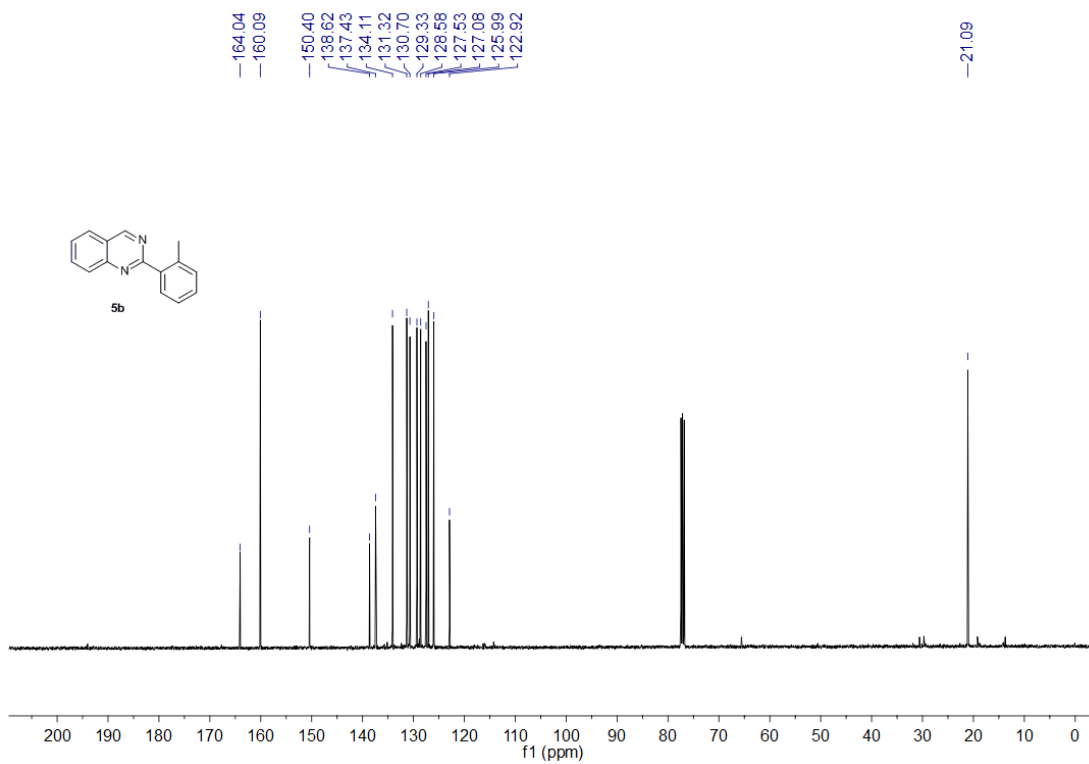

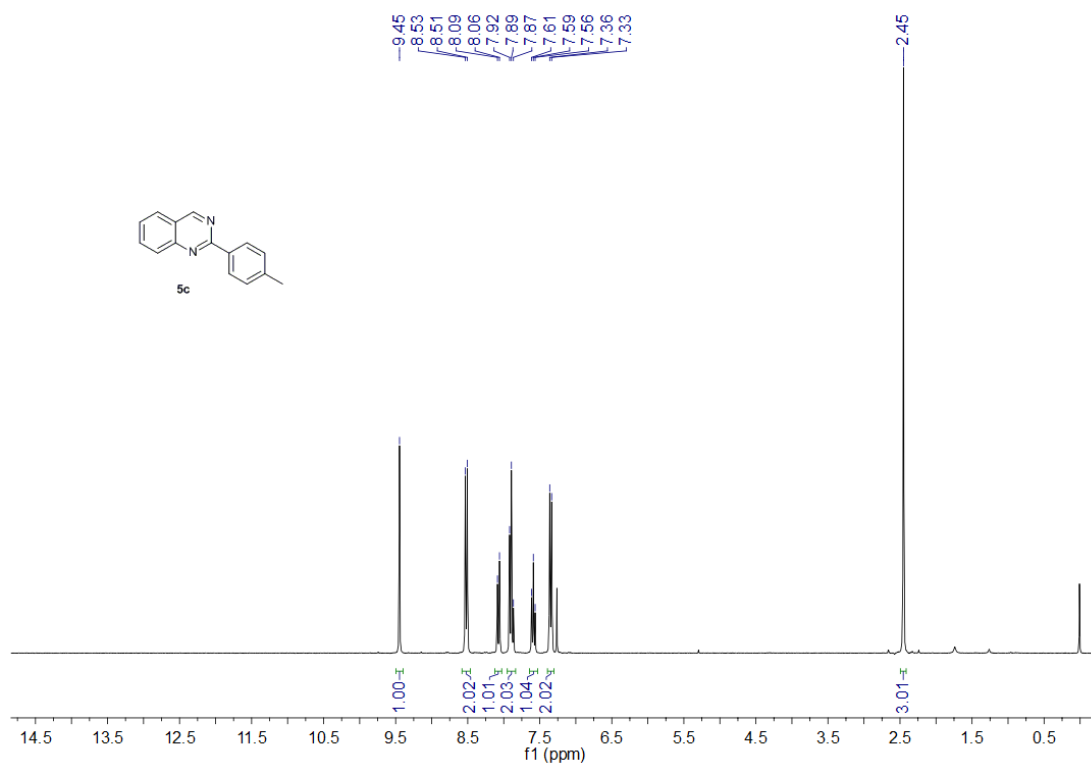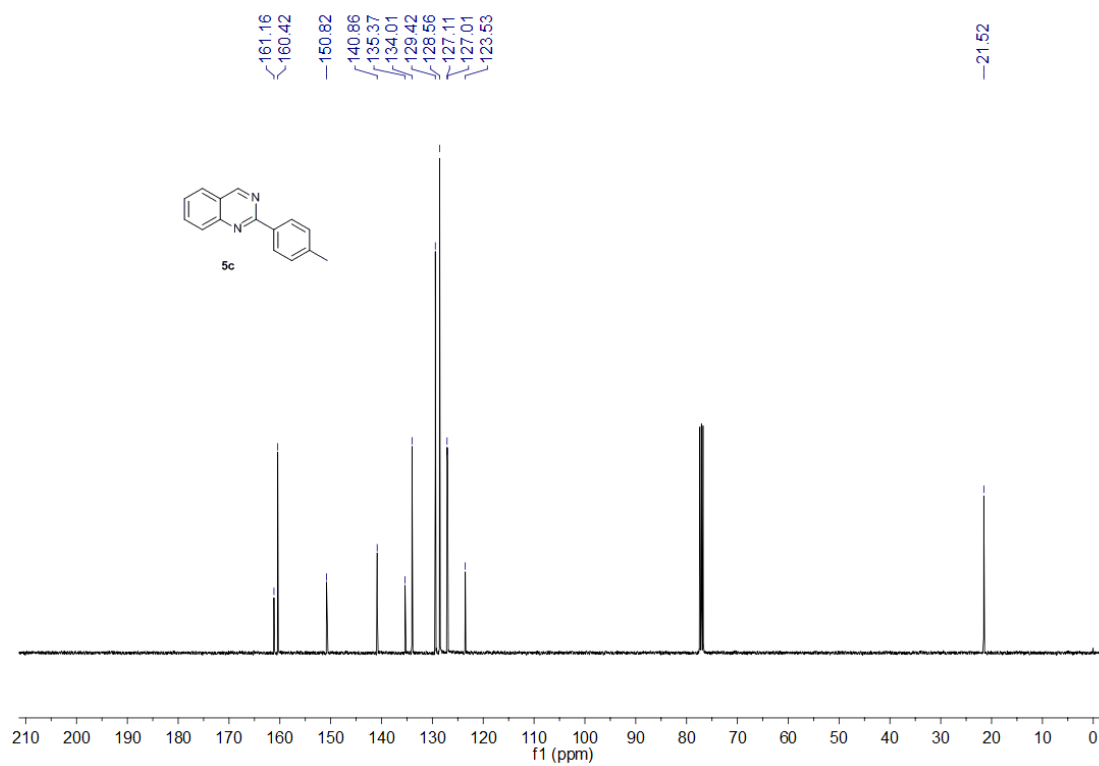



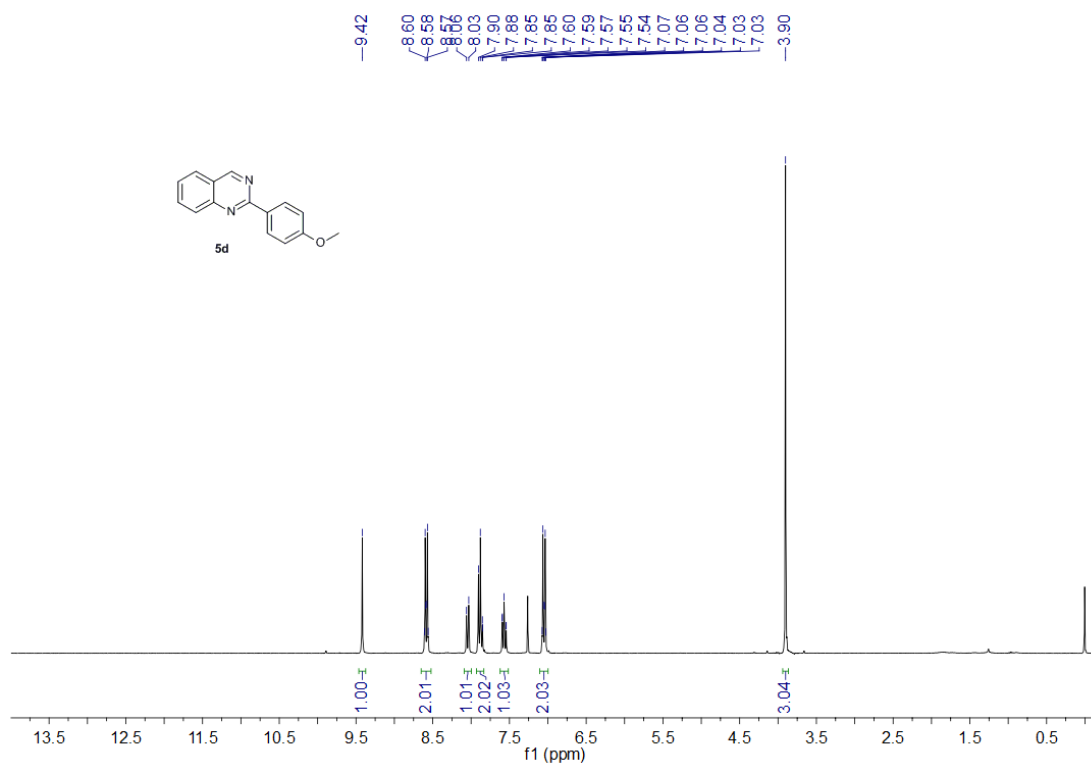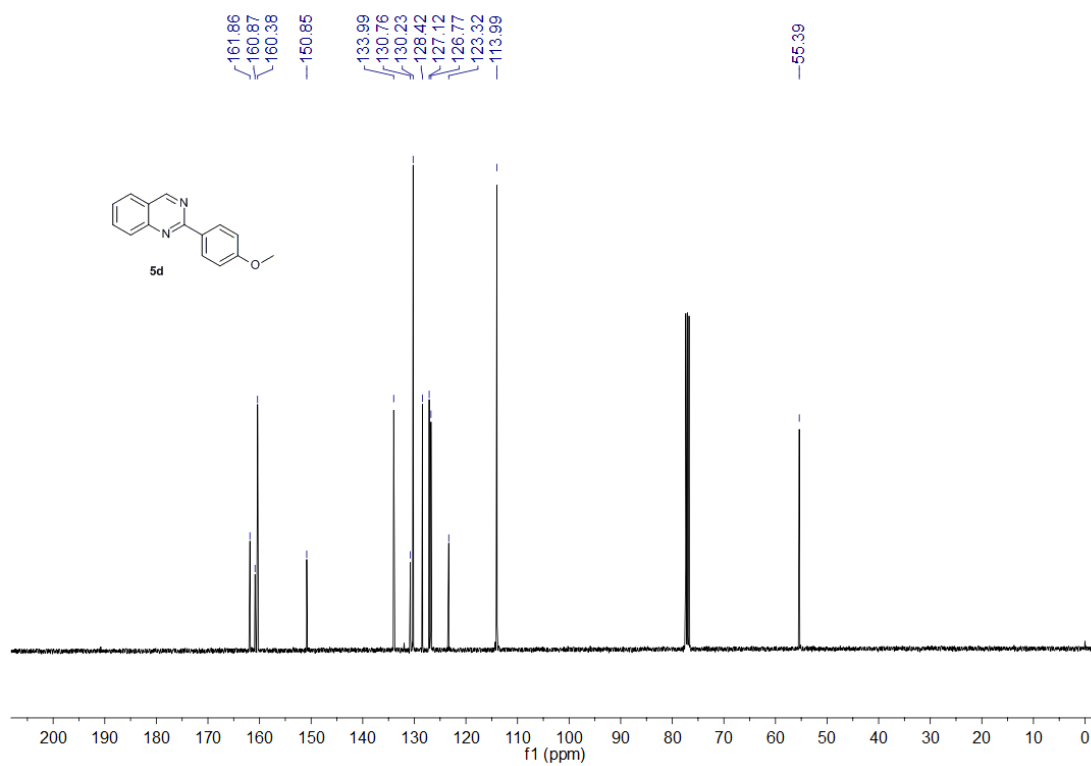

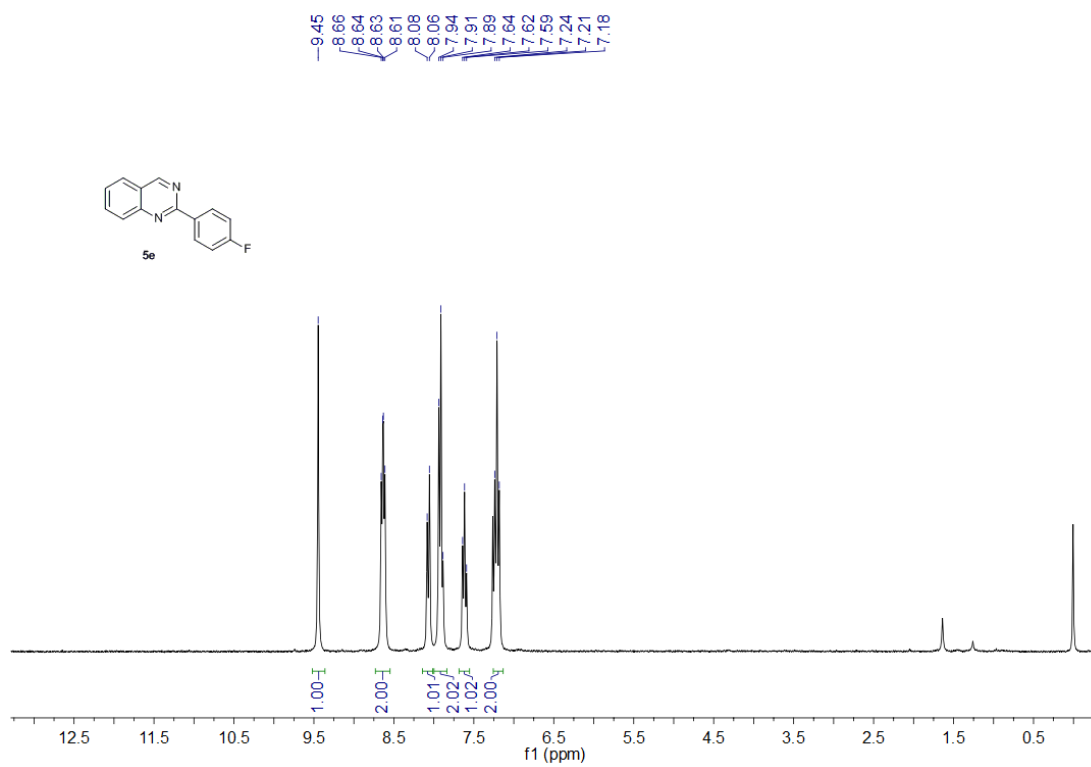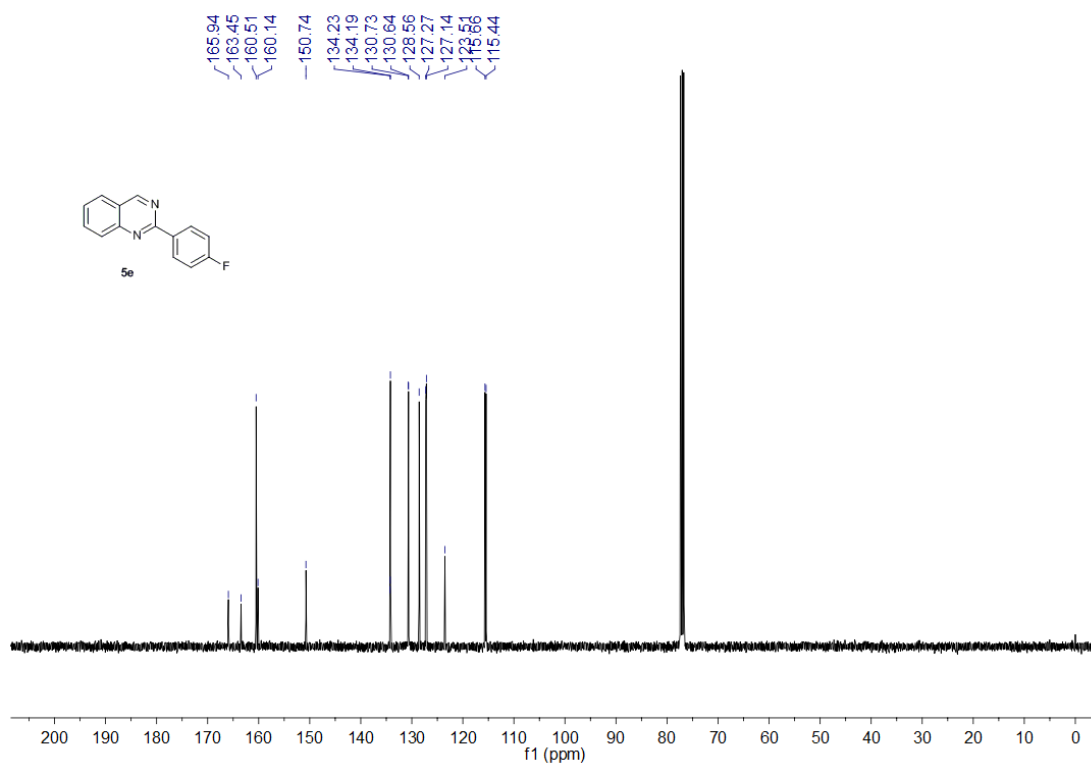

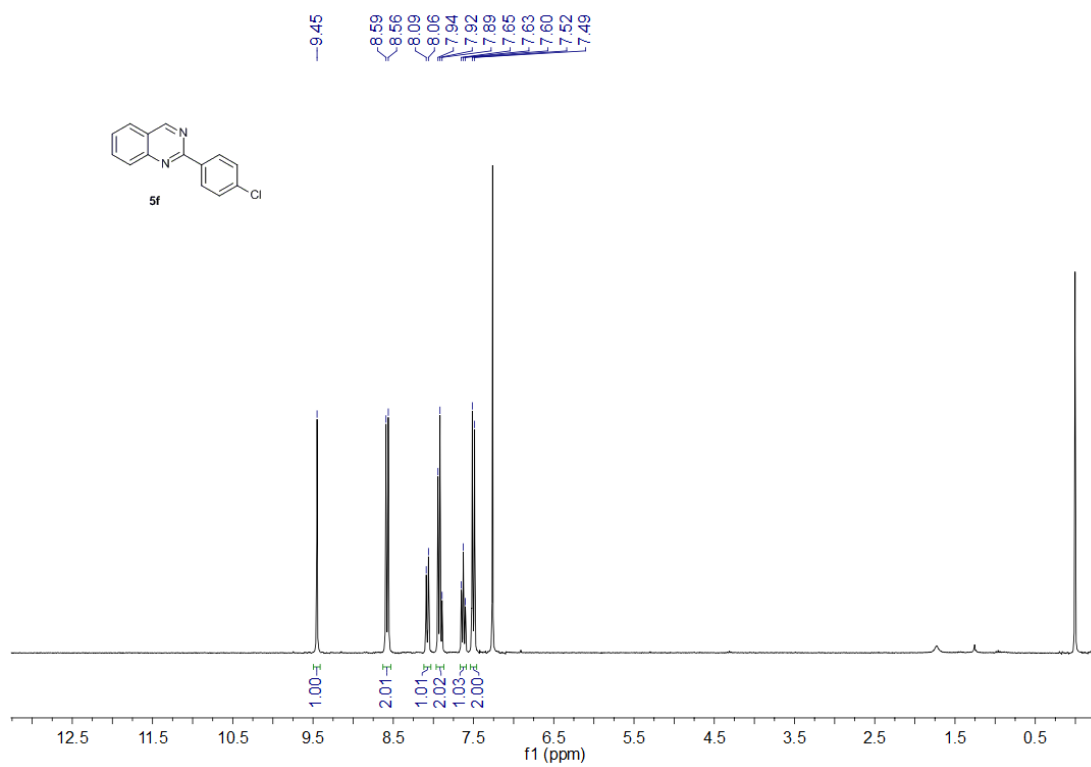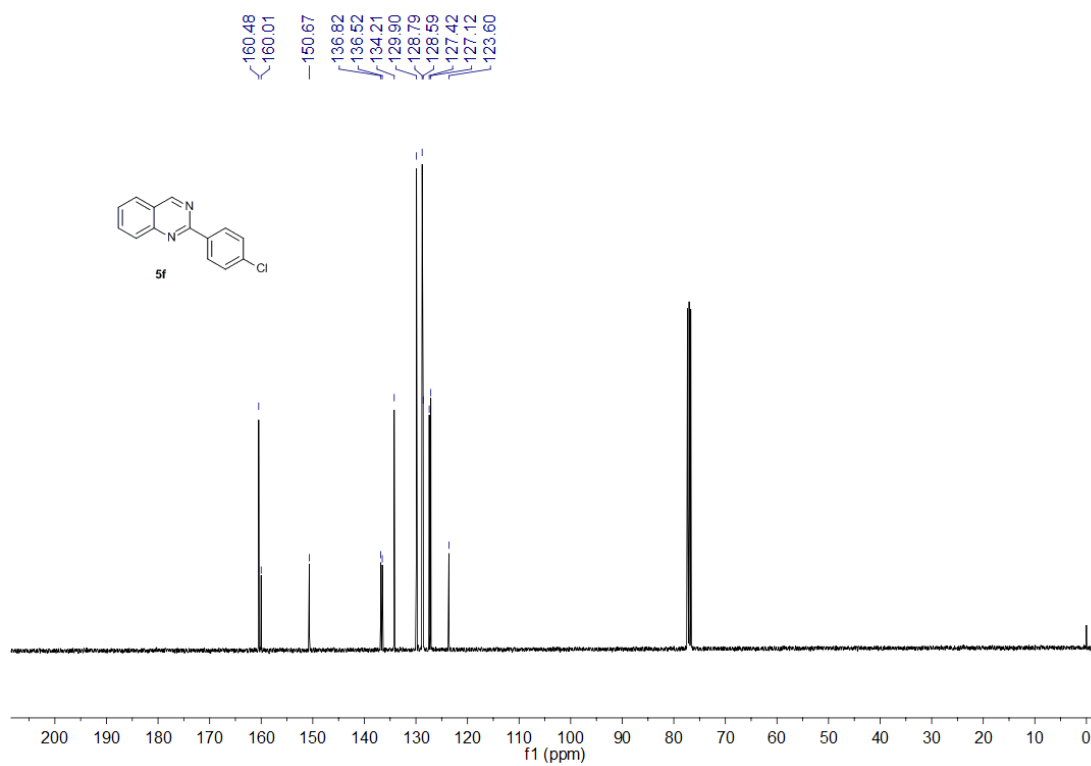

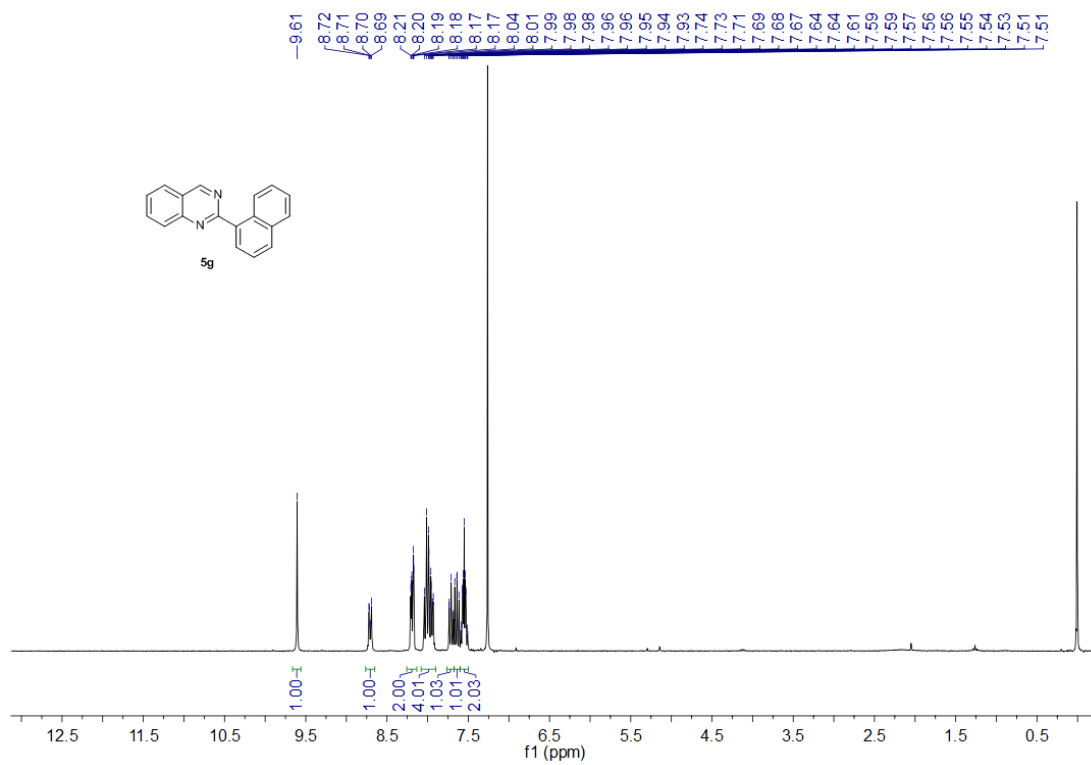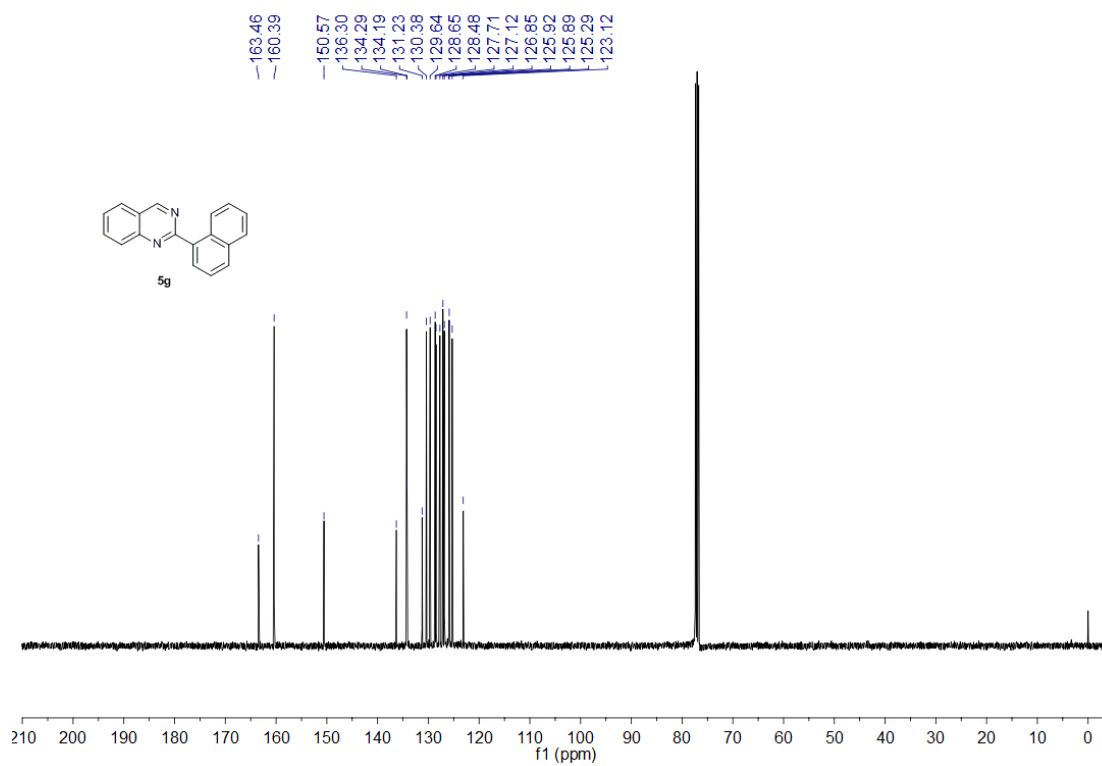

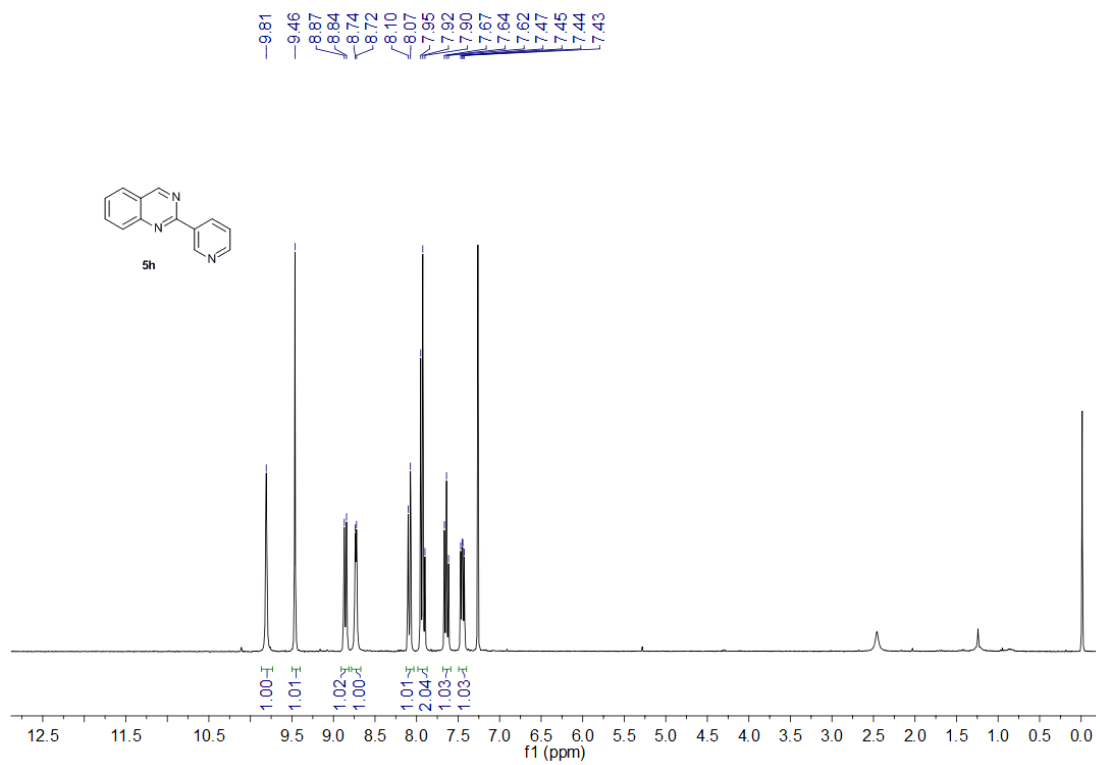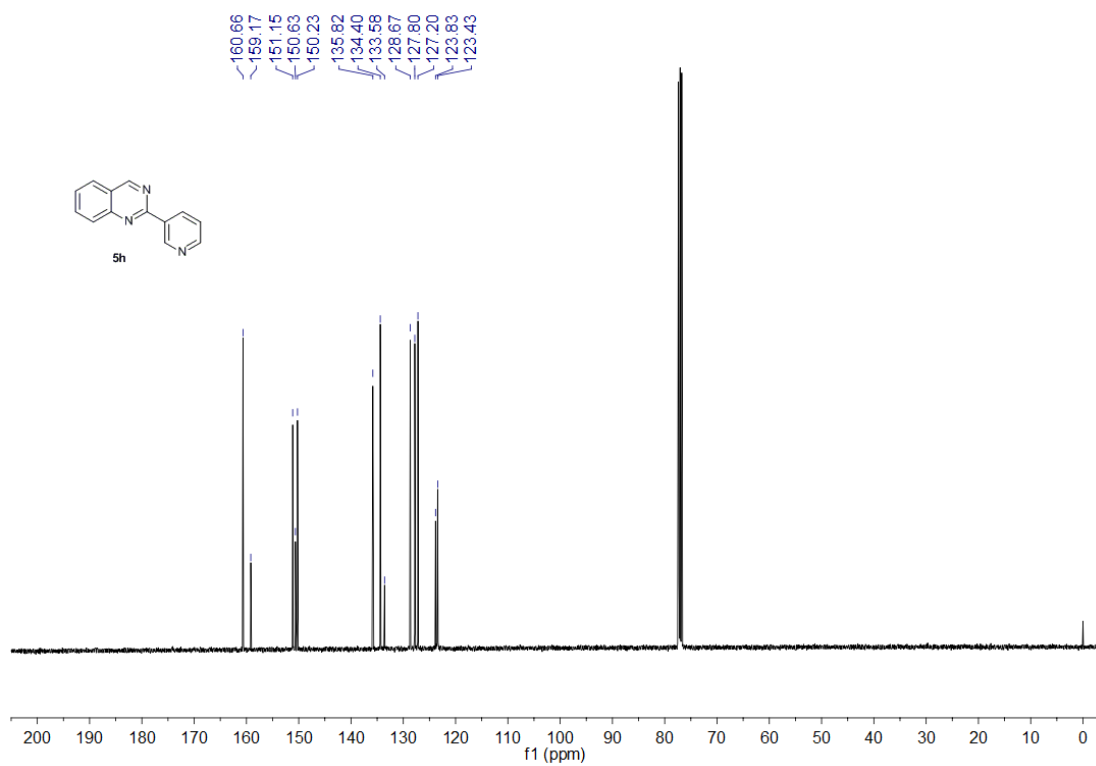

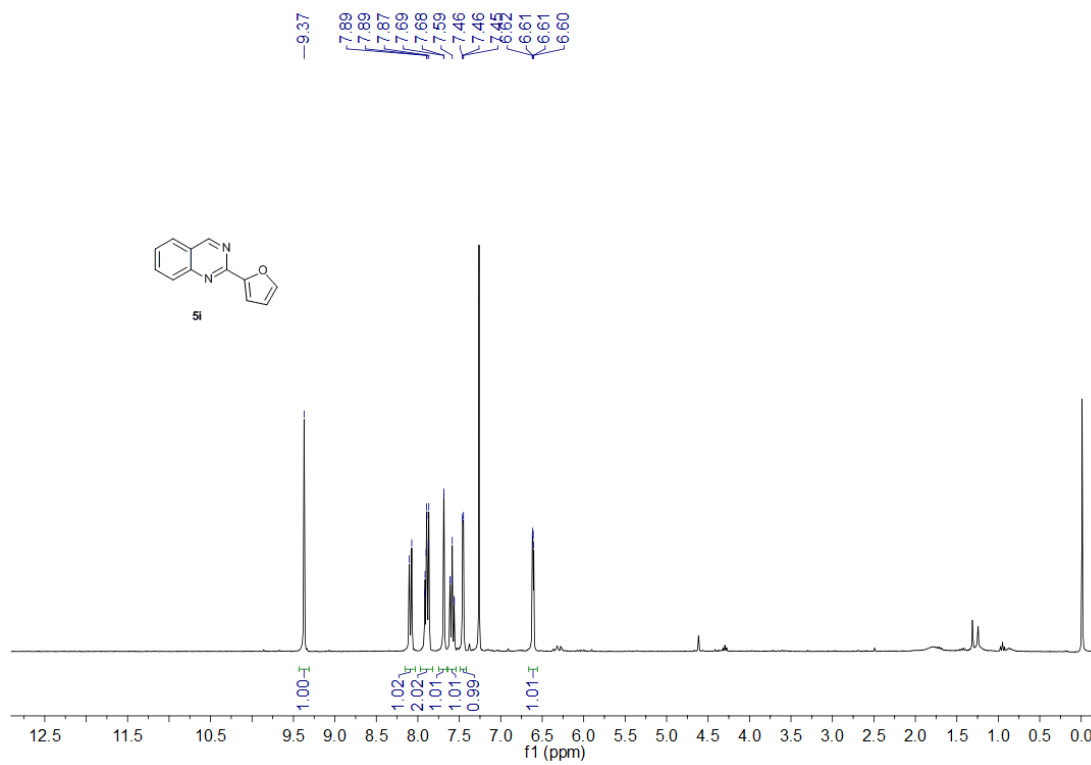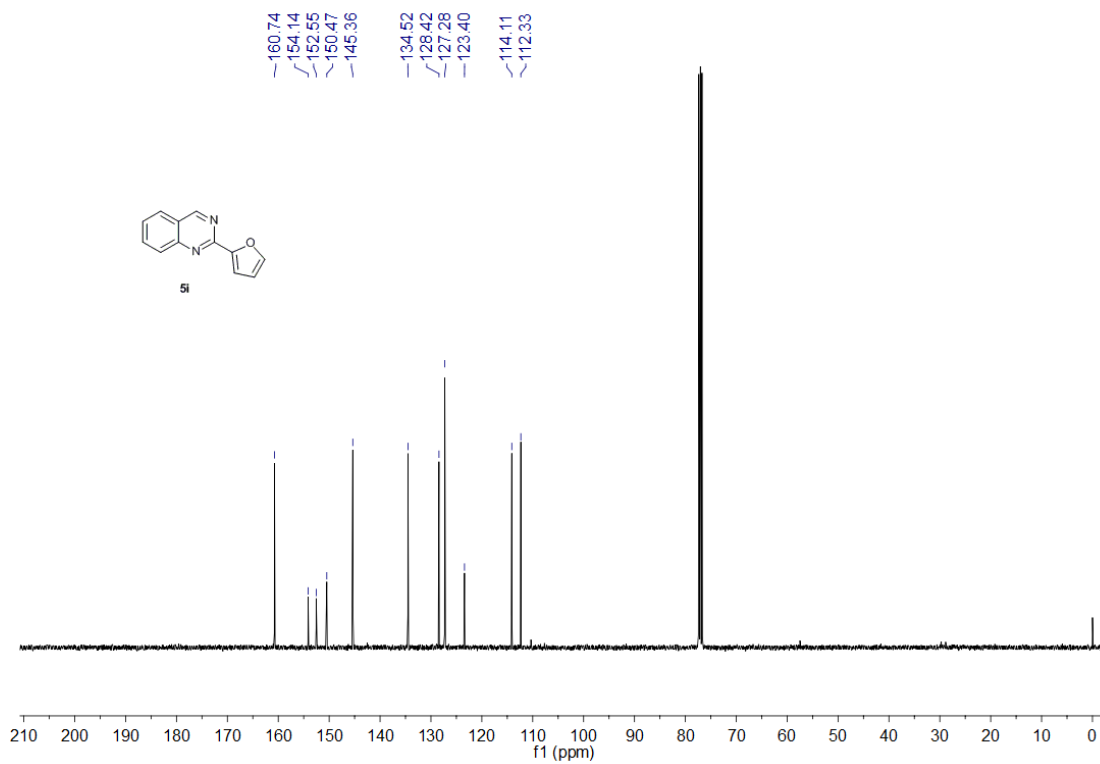

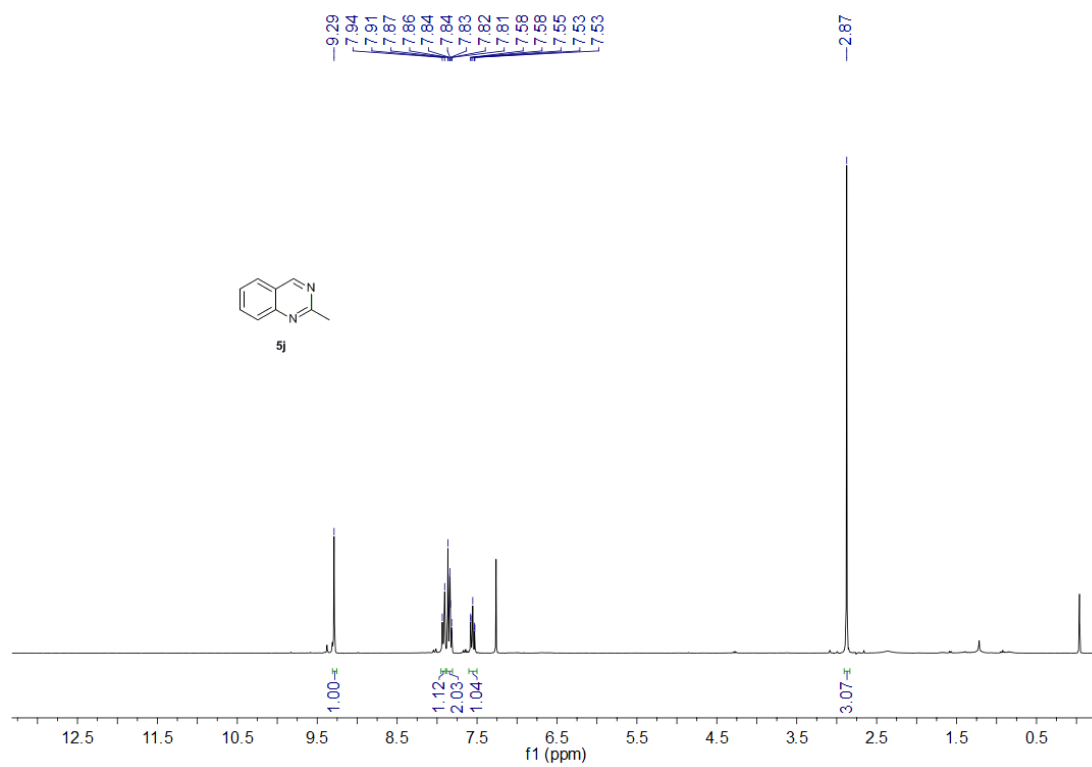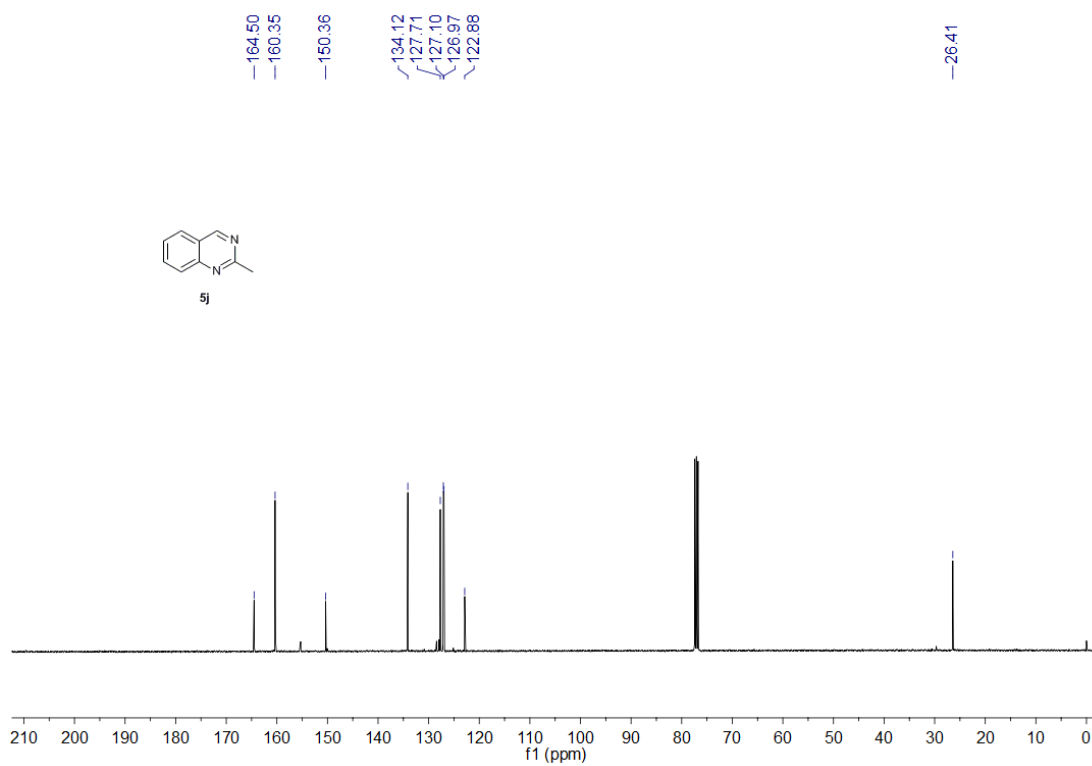

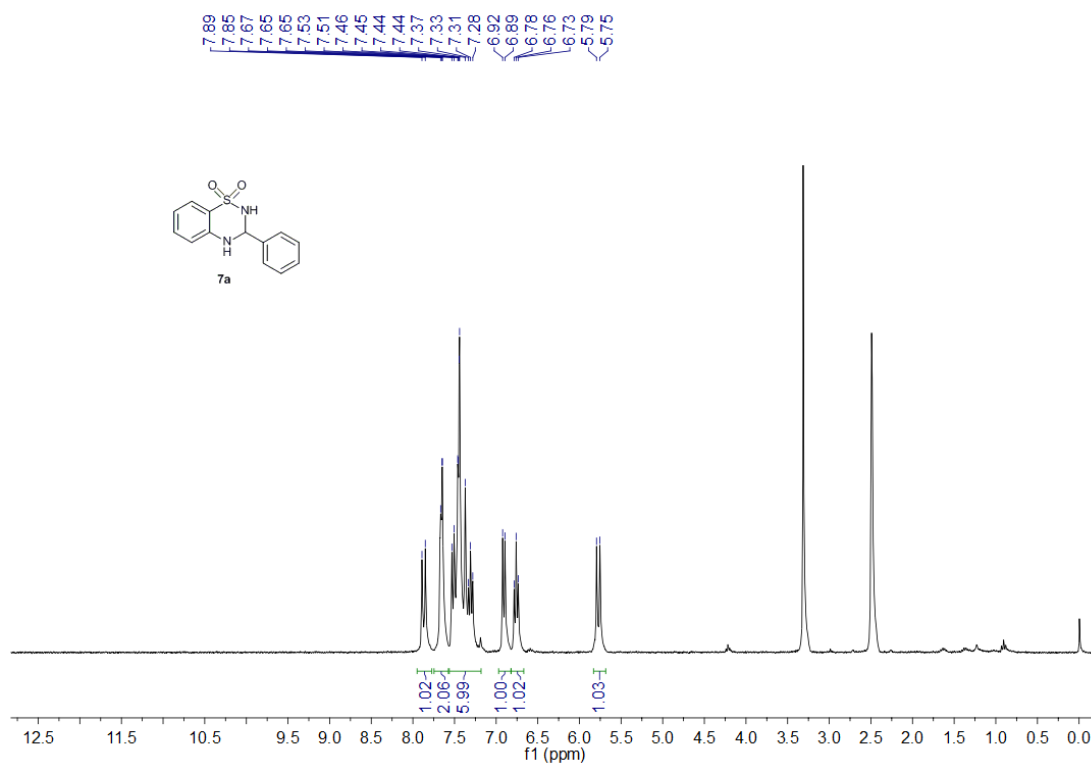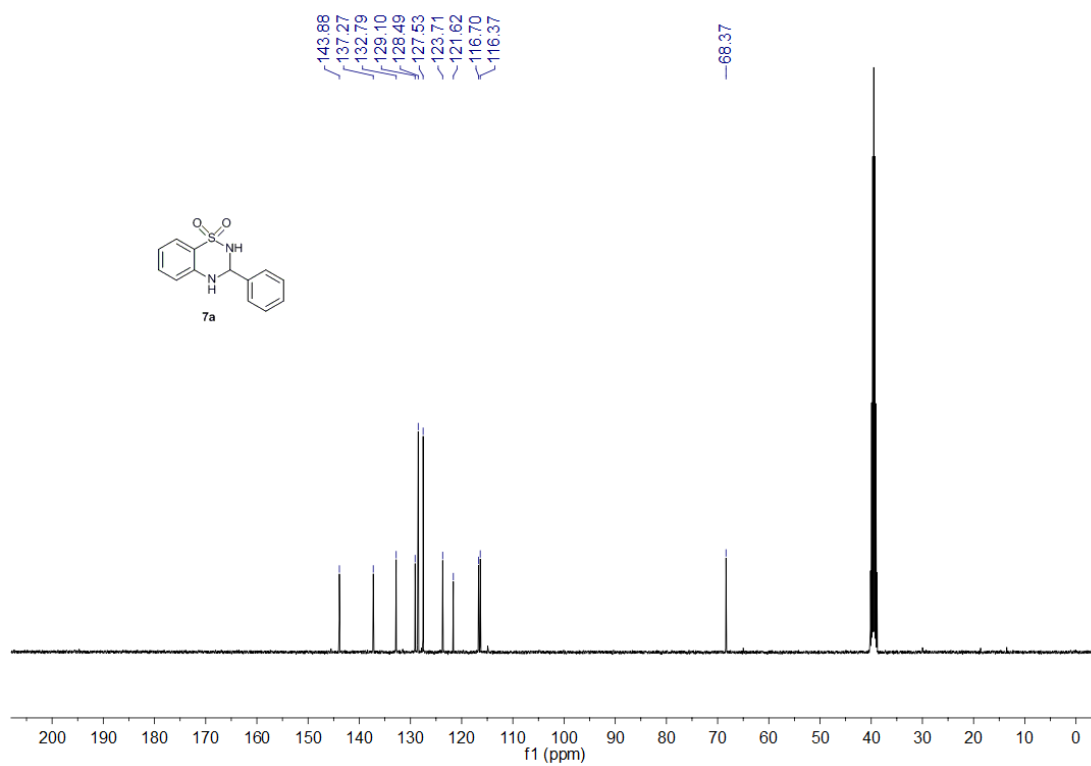



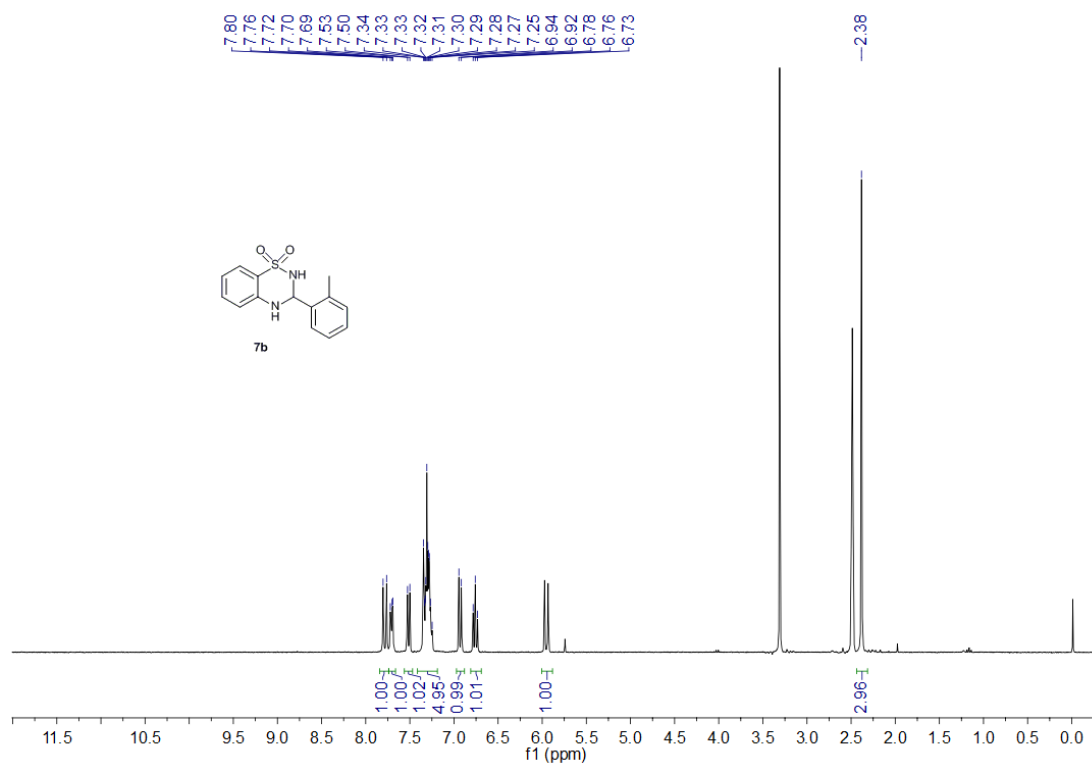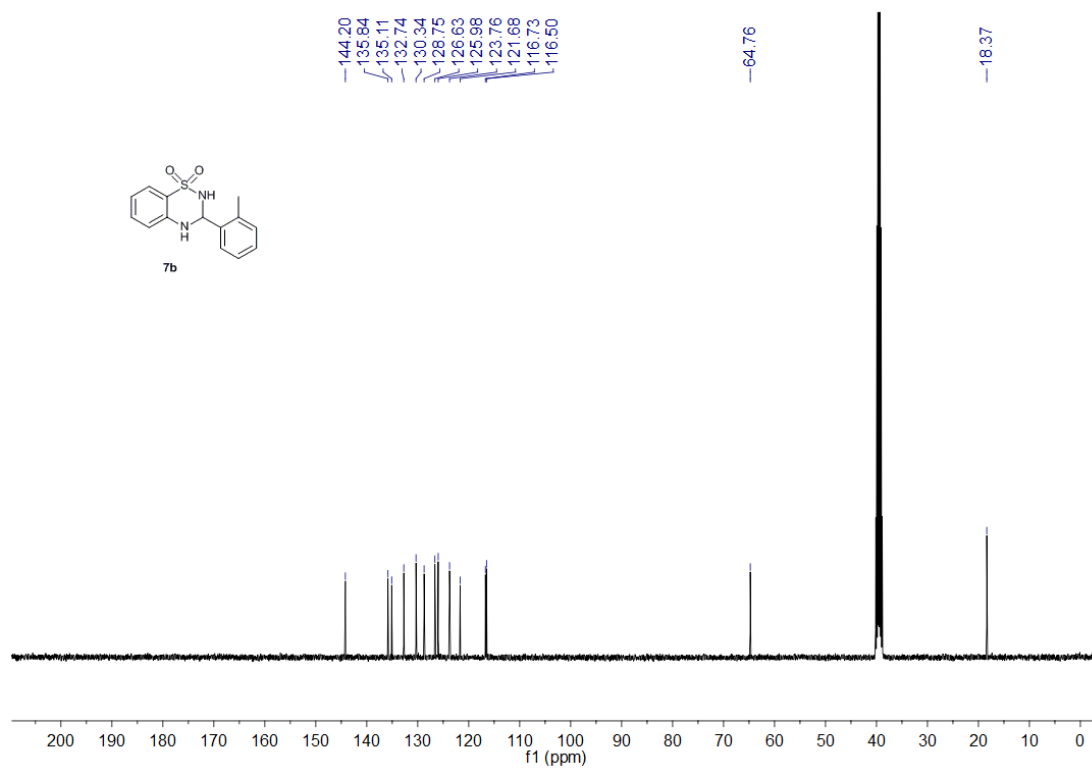

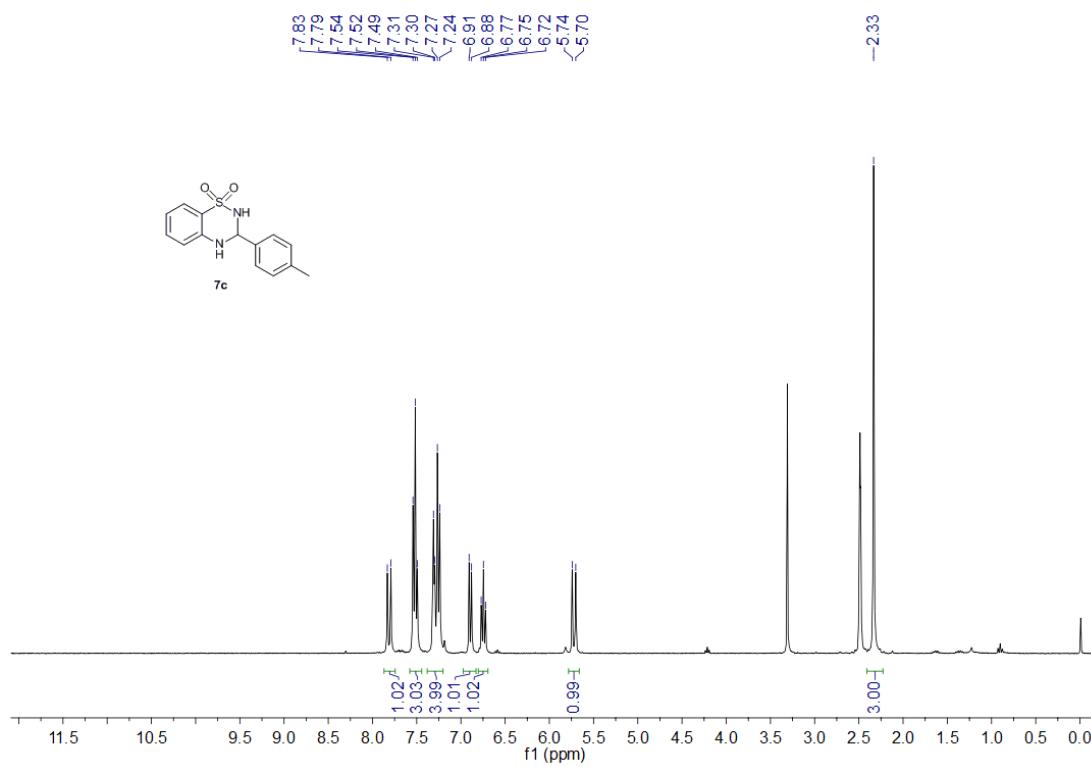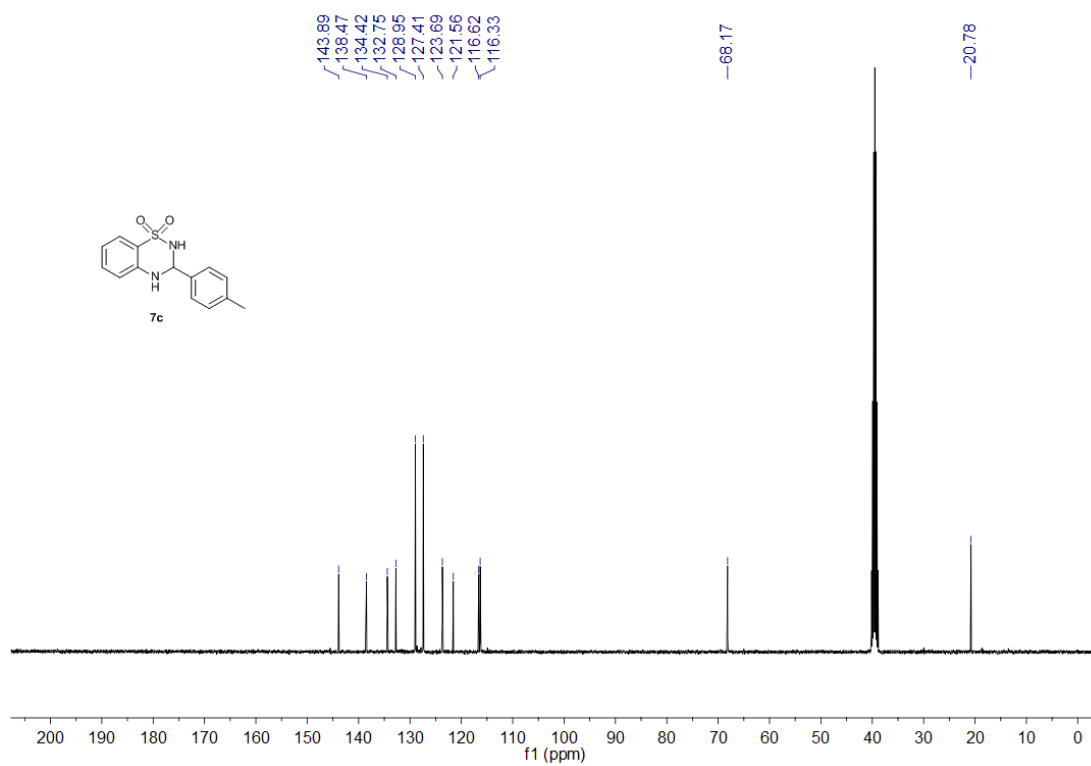

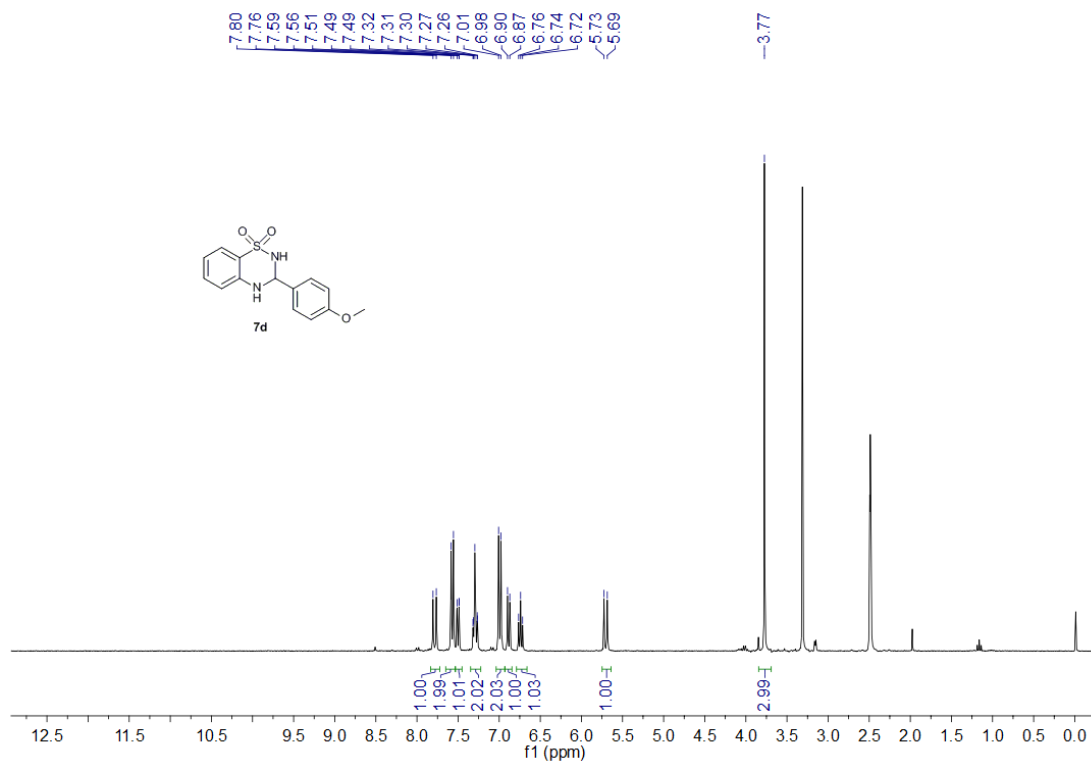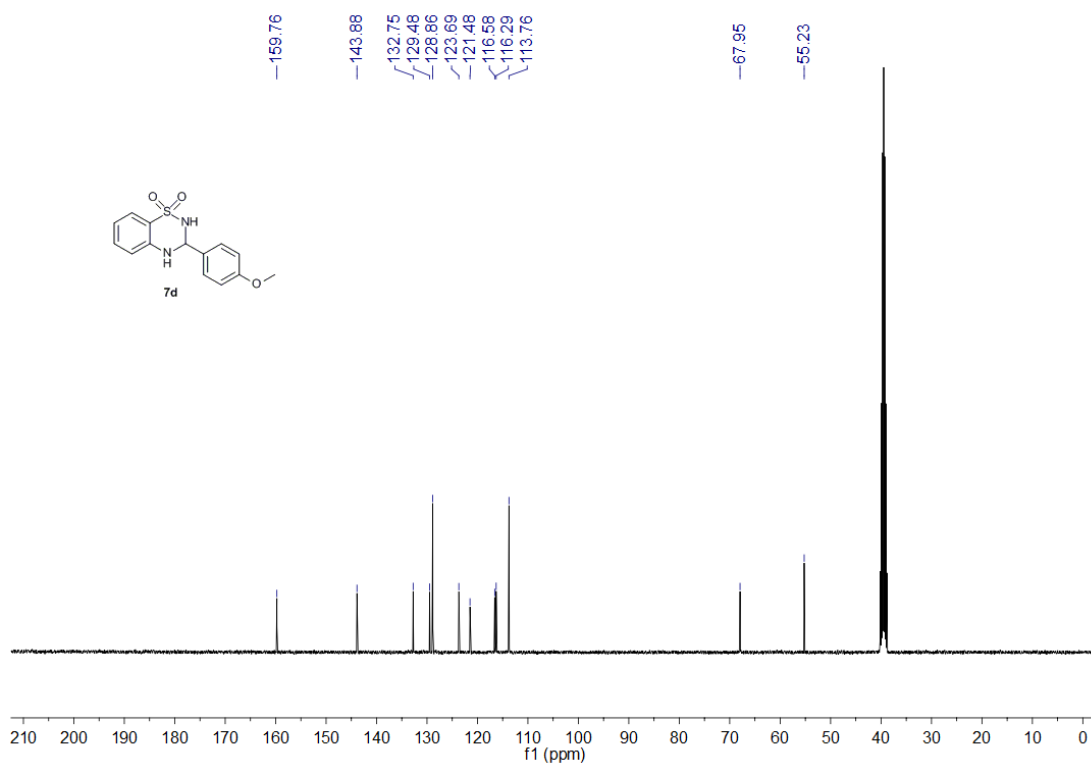

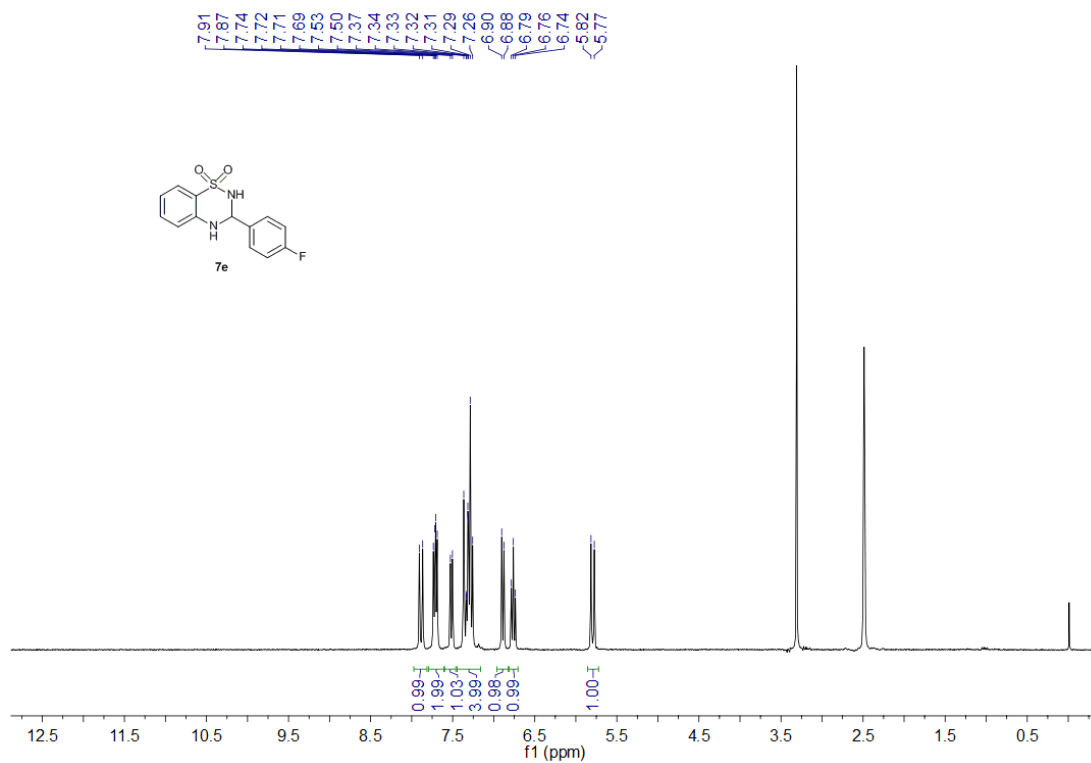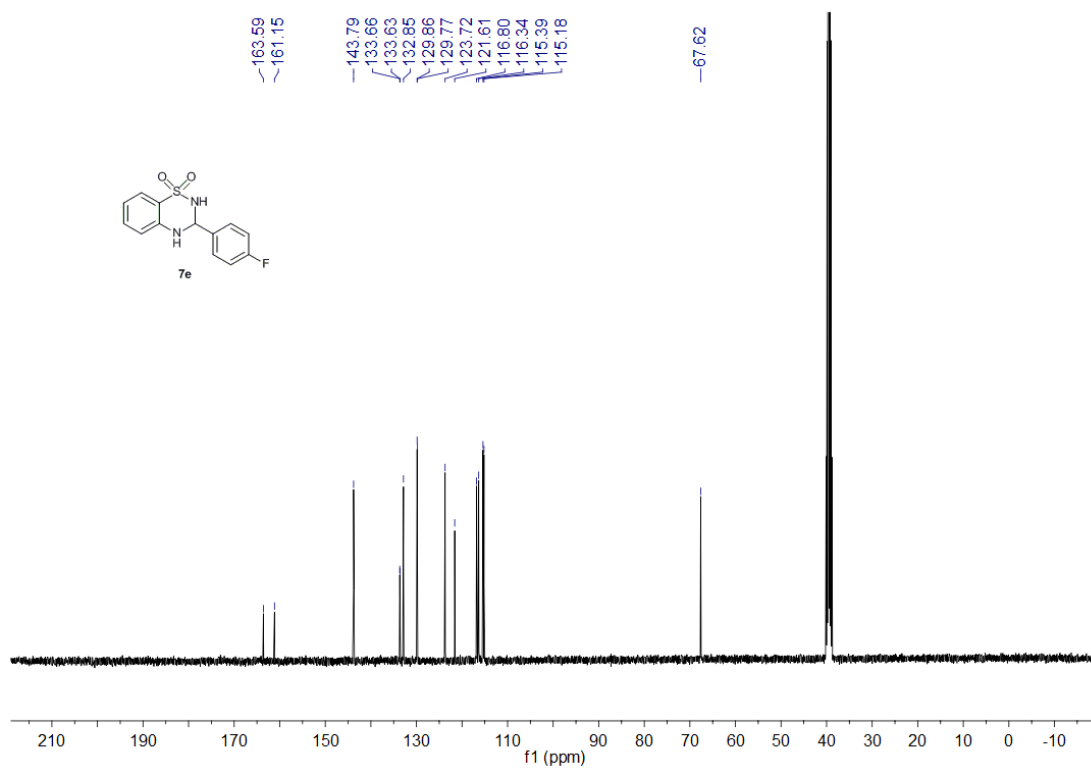

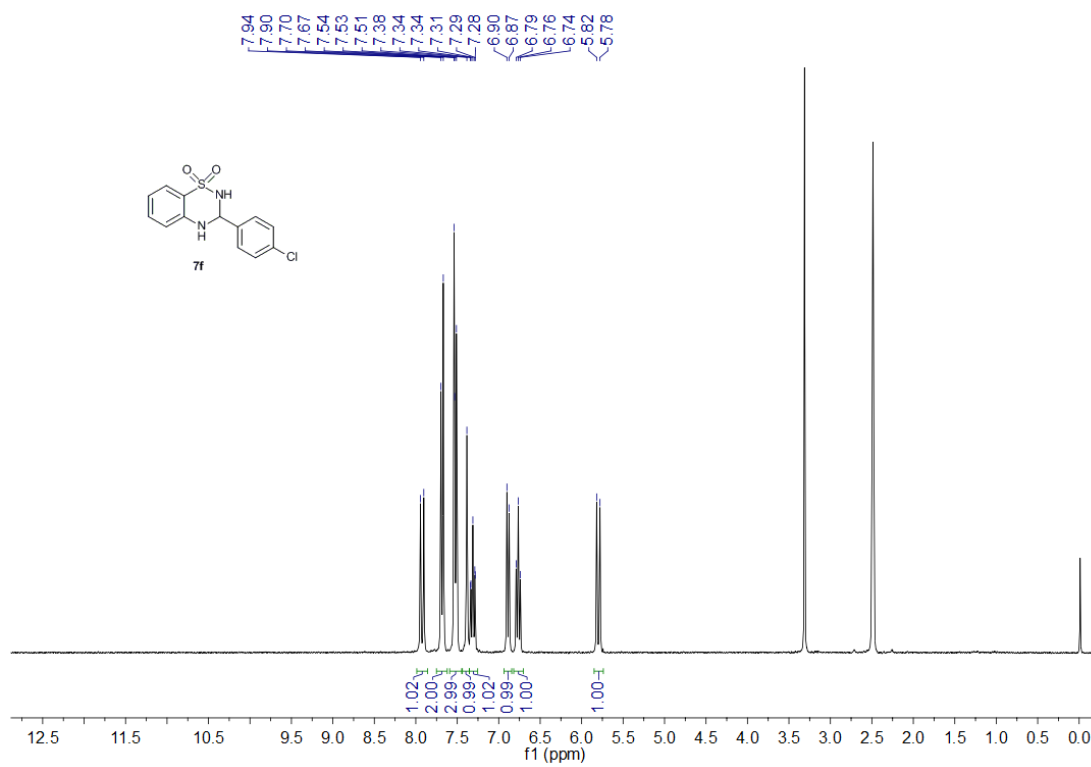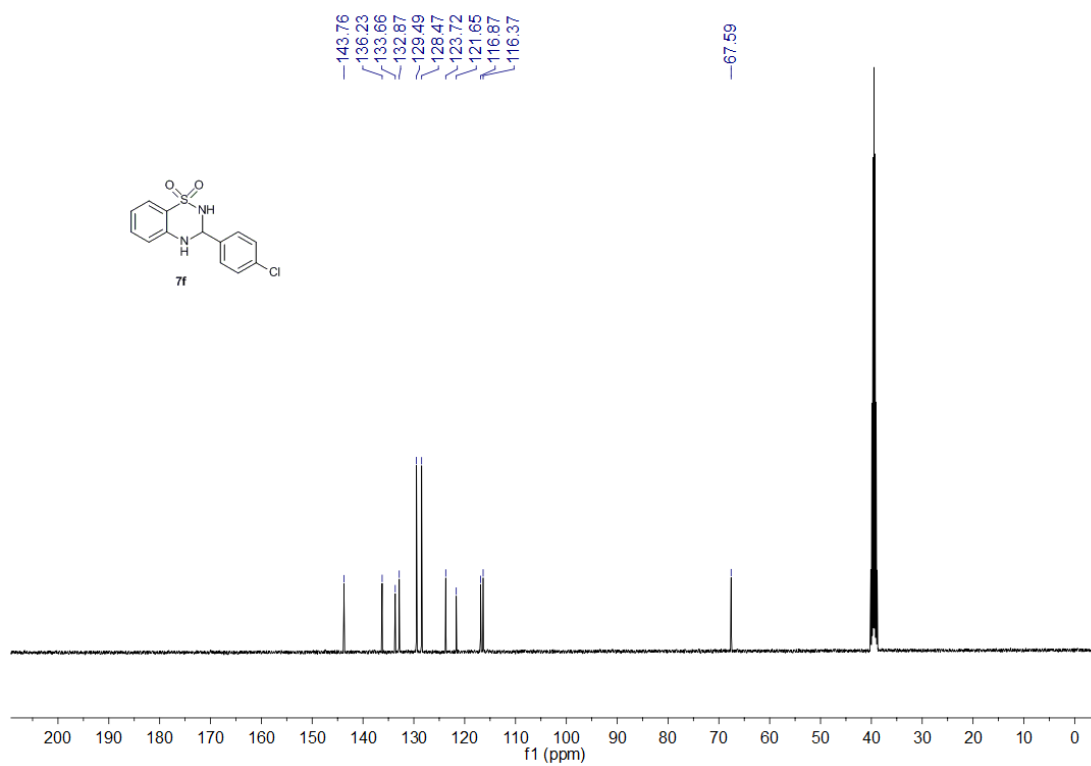

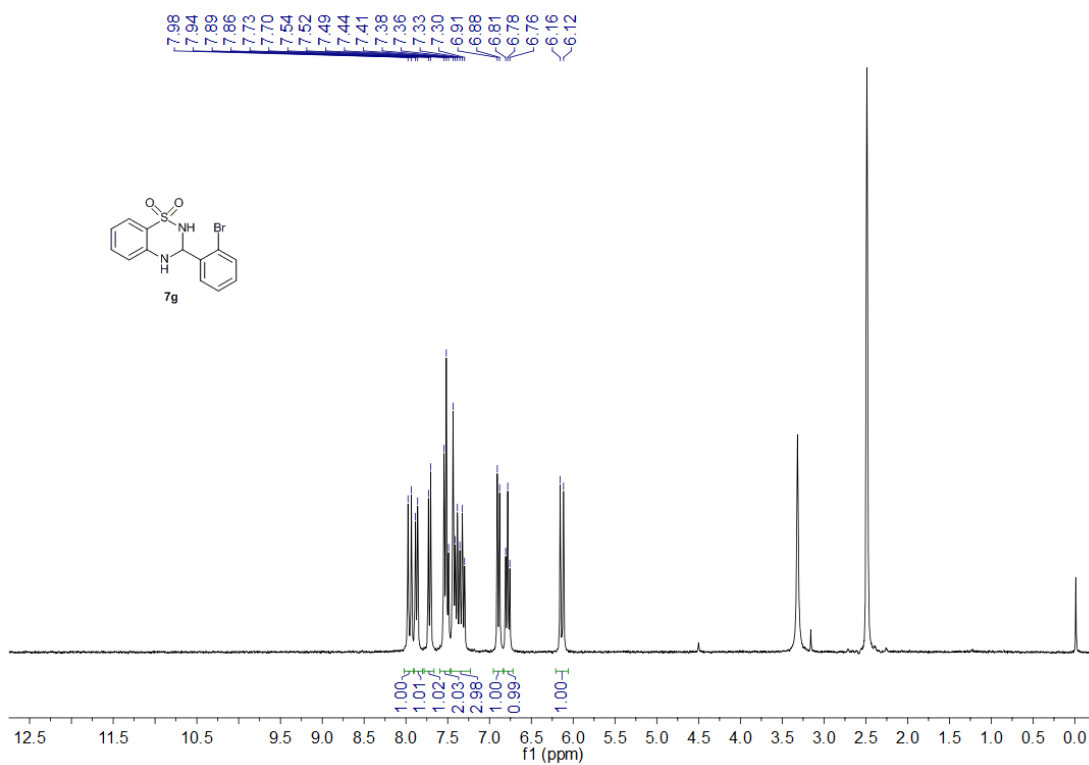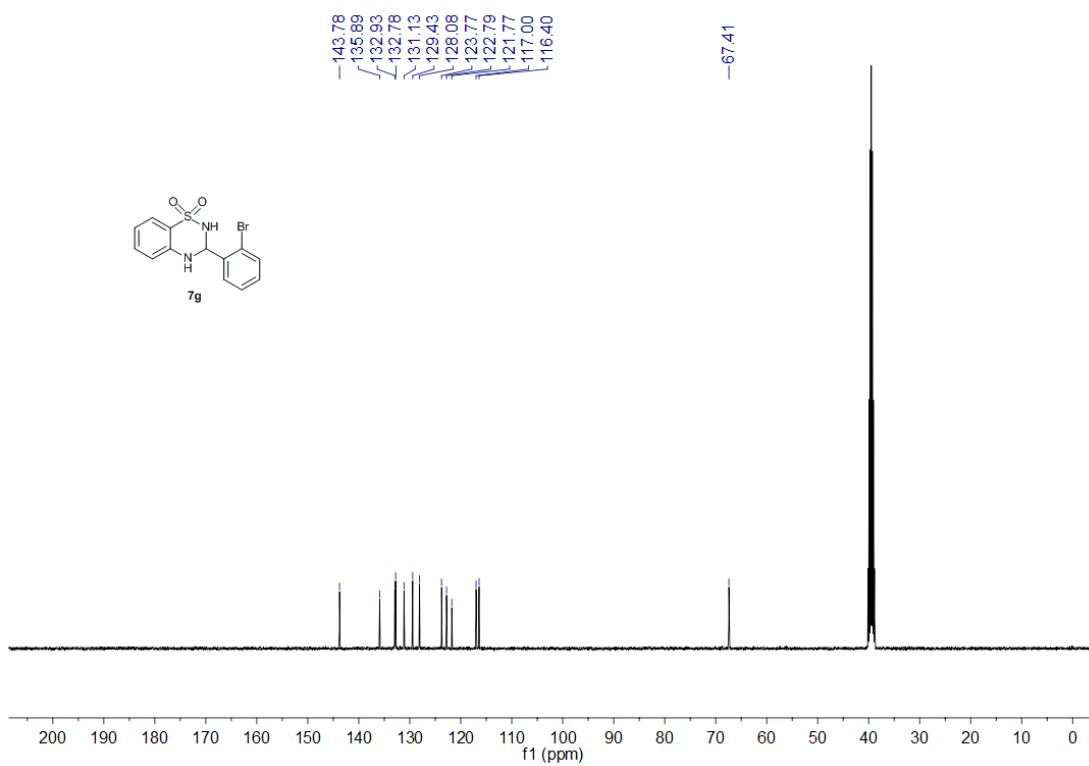

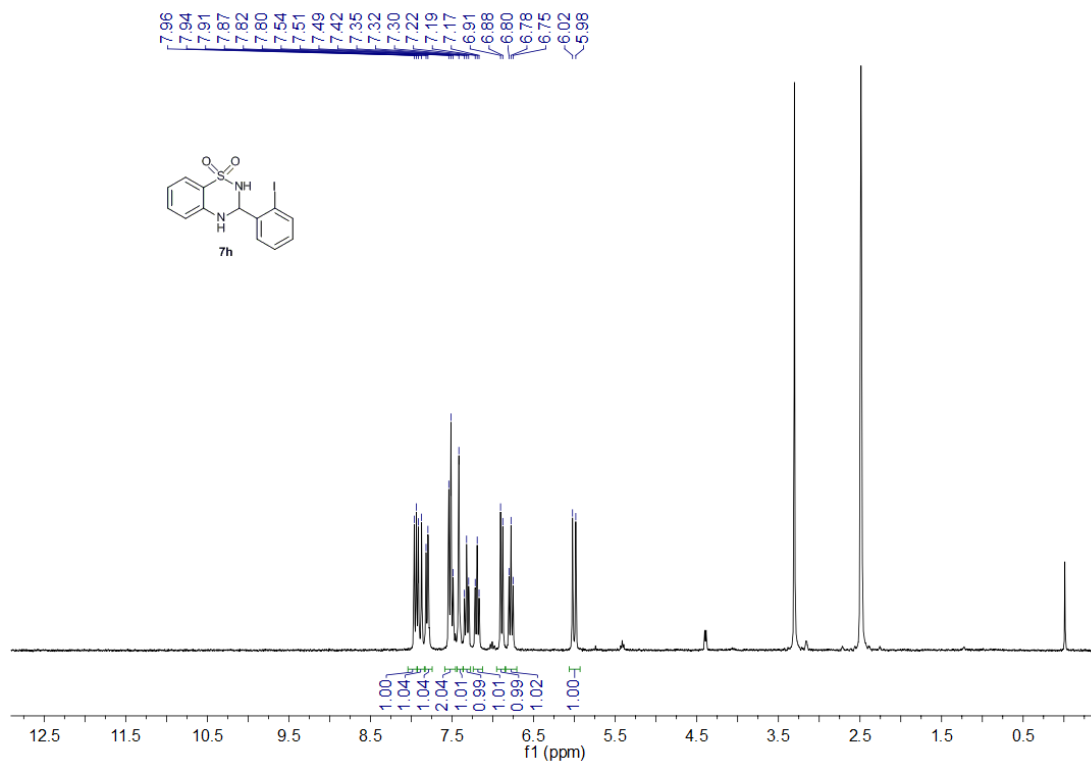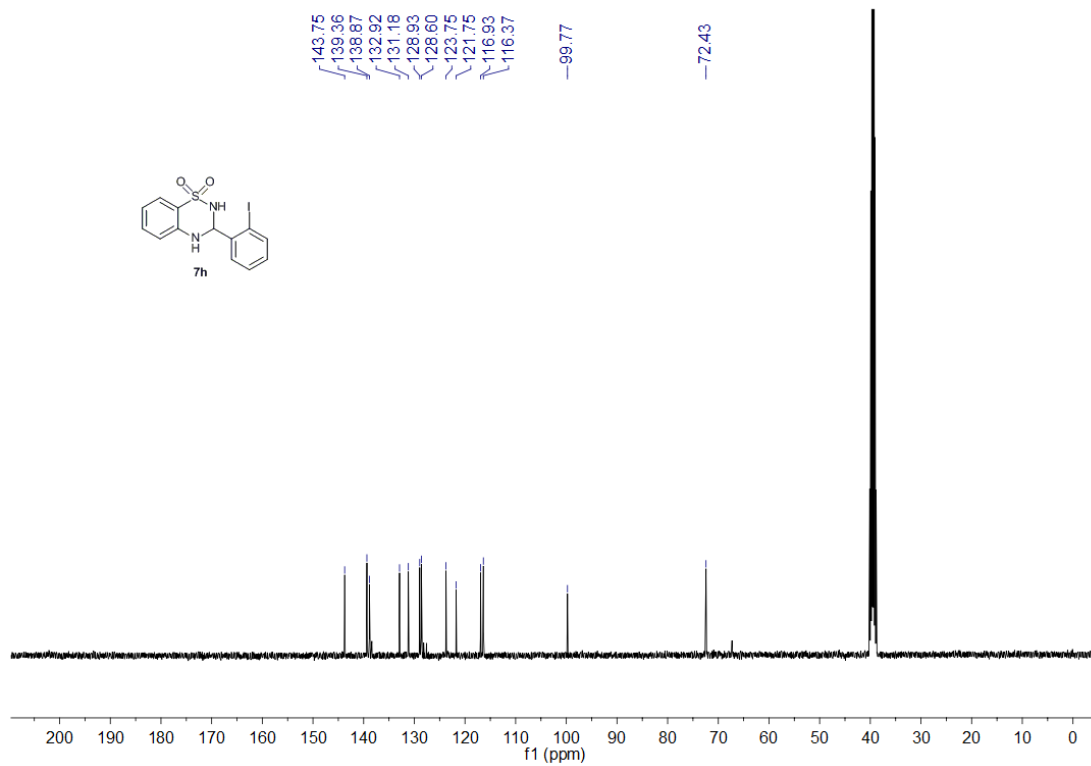

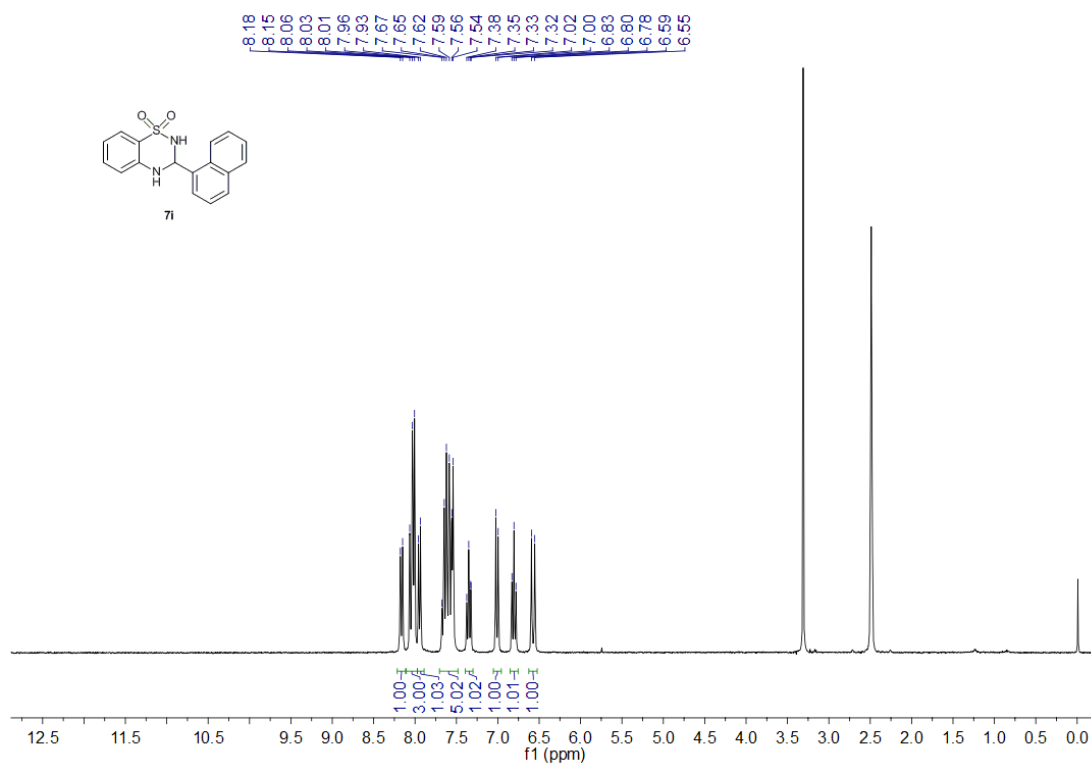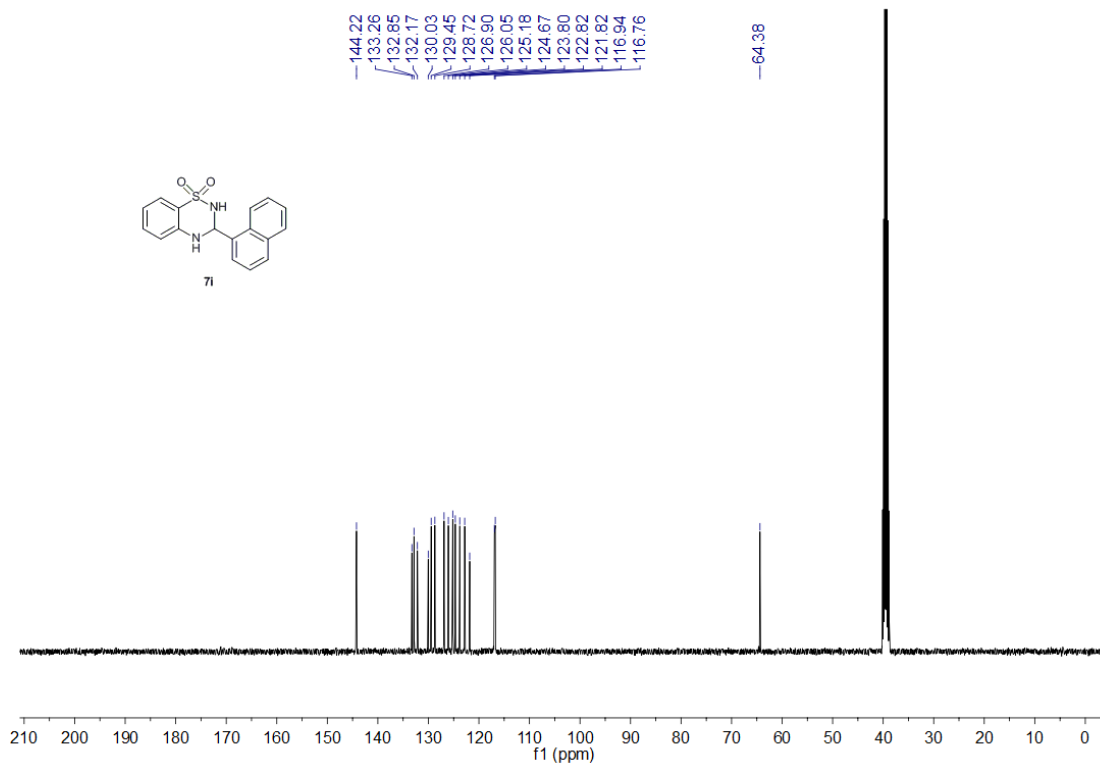



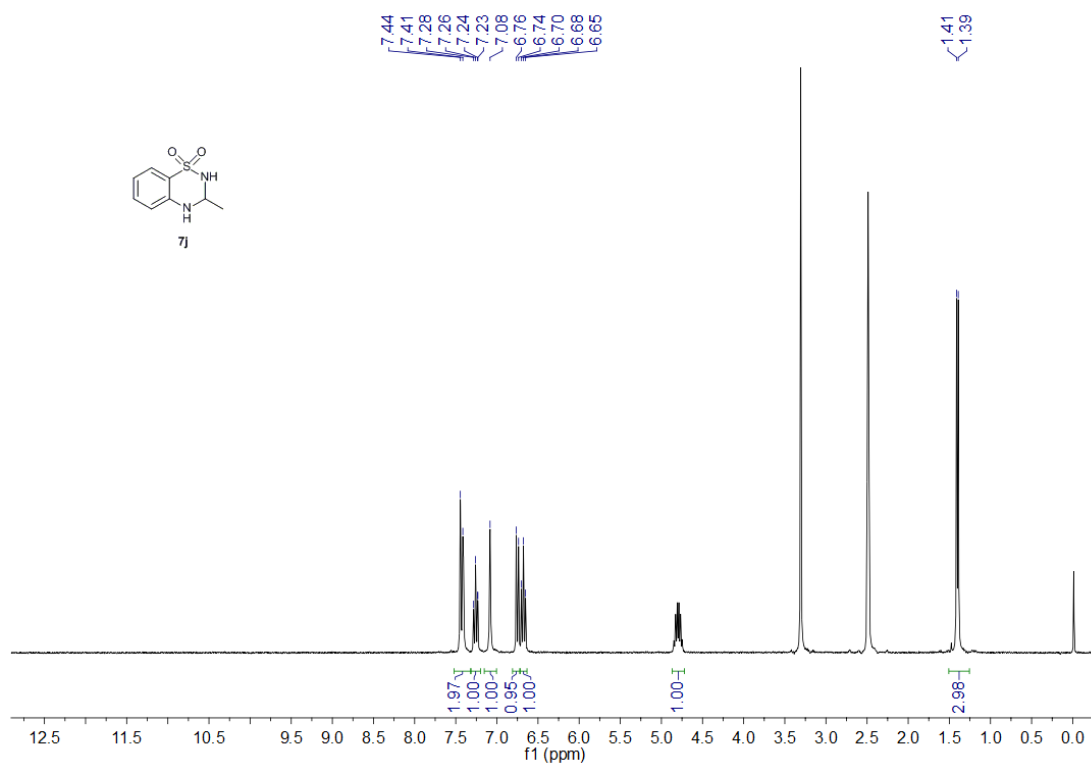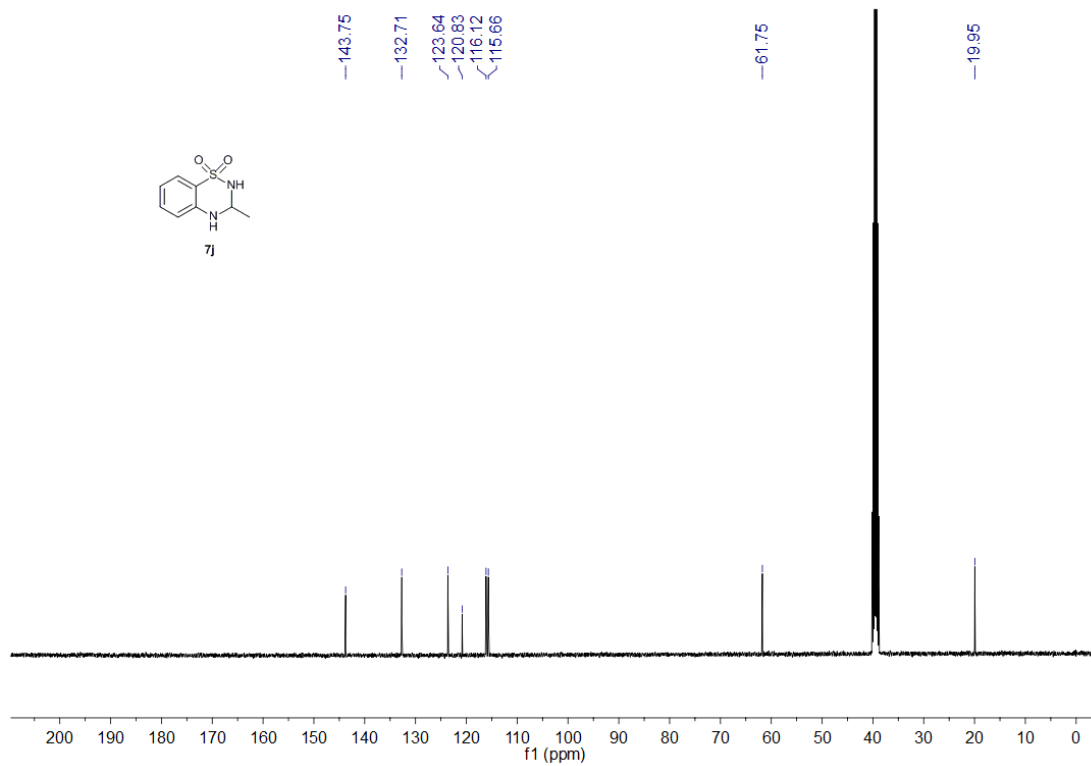

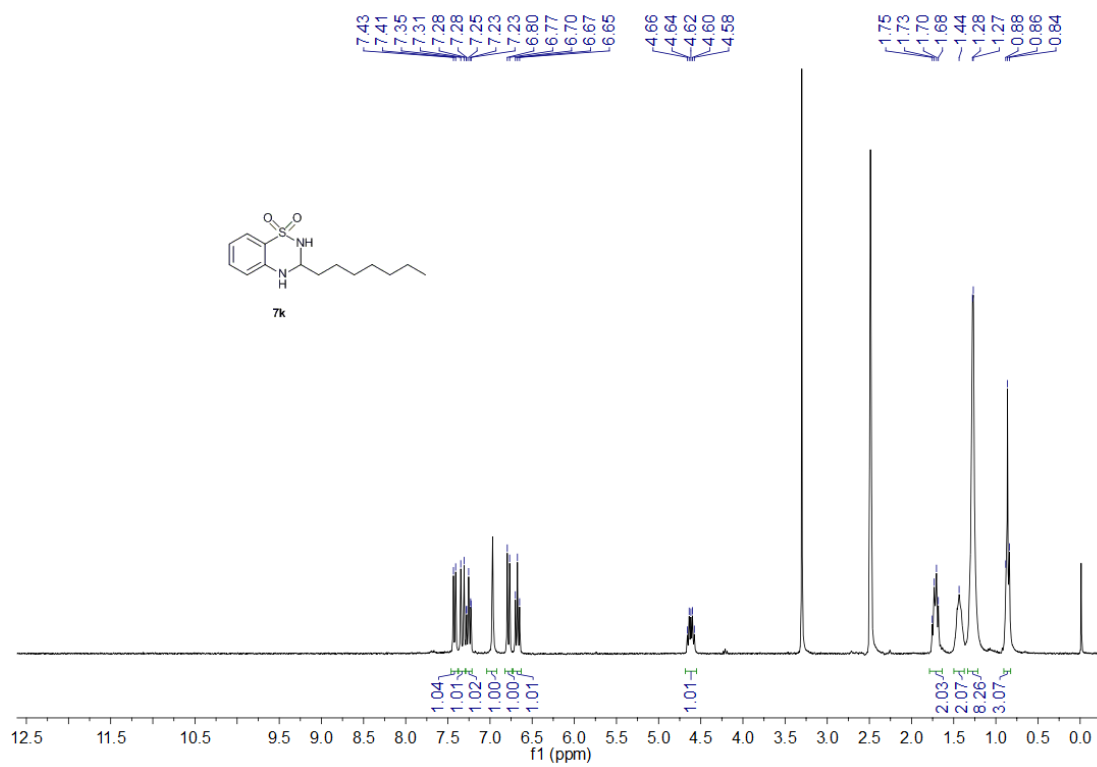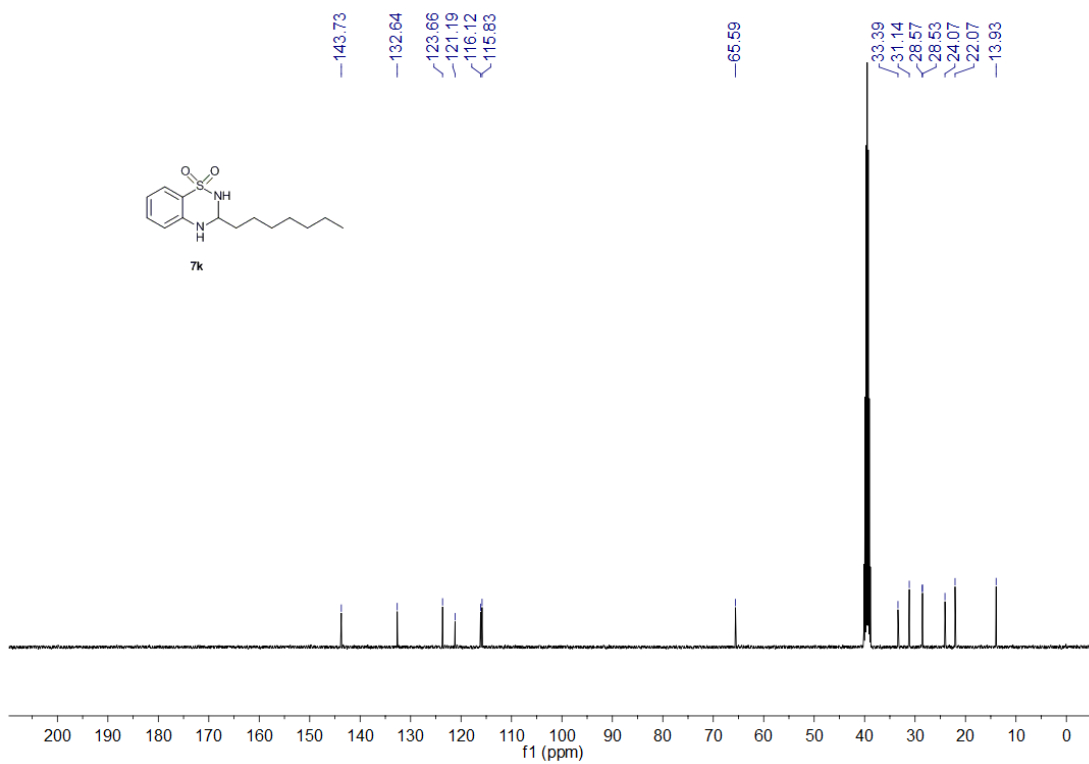

Supplement: c3ra46363j.pdf [file c3ra46363j.pdf]
